# Supplementary material for: GAF is essential for zygotic genome activation and chromatin accessibility in the early Drosophila embryo
Source: bioRxiv preprint, doi:10.1101/2020.07.15.204248, version 2 (2021-01-22)
Supplement: Supplemental File 1Su [file 204248_file14.xlsx]

## Sheet: Stage 3 (GAF-sfGFP(C))
chromosome	start	end
chr2L	5768	5968
chr2L	66856	67056
chr2L	107969	108169
chr2L	129250	129450
chr2L	131848	132048
chr2L	160951	161151
chr2L	166911	167111
chr2L	220542	220742
chr2L	222048	222248
chr2L	222987	223187
chr2L	223341	223541
chr2L	224137	224337
chr2L	246639	246839
chr2L	249195	249395
chr2L	368806	369006
chr2L	377721	377921
chr2L	431034	431234
chr2L	455447	455647
chr2L	472194	472394
chr2L	479788	479988
chr2L	480049	480249
chr2L	480788	480988
chr2L	486994	487194
chr2L	490655	490855
chr2L	491929	492129
chr2L	510591	510791
chr2L	516595	516795
chr2L	518188	518388
chr2L	522343	522543
chr2L	523046	523246
chr2L	523576	523776
chr2L	585386	585586
chr2L	594762	594962
chr2L	685382	685582
chr2L	701916	702116
chr2L	715218	715418
chr2L	826481	826681
chr2L	867218	867418
chr2L	868317	868517
chr2L	1118993	1119193
chr2L	1617733	1617933
chr2L	1643673	1643873
chr2L	1648828	1649028
chr2L	1649960	1650160
chr2L	1650774	1650974
chr2L	1651073	1651273
chr2L	1663185	1663385
chr2L	1737308	1737508
chr2L	1909873	1910073
chr2L	1954626	1954826
chr2L	1970508	1970708
chr2L	1971461	1971661
chr2L	1972804	1973004
chr2L	2013910	2014110
chr2L	2130336	2130536
chr2L	2161496	2161696
chr2L	2162929	2163129
chr2L	2163704	2163904
chr2L	2175531	2175731
chr2L	2178717	2178917
chr2L	2197109	2197309
chr2L	2200360	2200560
chr2L	2201336	2201536
chr2L	2202394	2202594
chr2L	2203307	2203507
chr2L	2221902	2222102
chr2L	2242193	2242393
chr2L	2363008	2363208
chr2L	2451004	2451204
chr2L	2454492	2454692
chr2L	2576668	2576868
chr2L	2701001	2701201
chr2L	2753050	2753250
chr2L	2754394	2754594
chr2L	2755316	2755516
chr2L	2798894	2799094
chr2L	2829989	2830189
chr2L	2830754	2830954
chr2L	2861586	2861786
chr2L	2862360	2862560
chr2L	2874797	2874997
chr2L	2886610	2886810
chr2L	2888136	2888336
chr2L	2888848	2889048
chr2L	2889274	2889474
chr2L	2909535	2909735
chr2L	2955935	2956135
chr2L	2957912	2958112
chr2L	2958950	2959150
chr2L	2999877	3000077
chr2L	3056436	3056636
chr2L	3095189	3095389
chr2L	3303127	3303327
chr2L	3354808	3355008
chr2L	3426052	3426252
chr2L	3426883	3427083
chr2L	3476575	3476775
chr2L	3478272	3478472
chr2L	3534277	3534477
chr2L	3538987	3539187
chr2L	3539511	3539711
chr2L	3540083	3540283
chr2L	3545361	3545561
chr2L	3580806	3581006
chr2L	3594224	3594424
chr2L	3606493	3606693
chr2L	3632134	3632334
chr2L	3632912	3633112
chr2L	3648493	3648693
chr2L	3655581	3655781
chr2L	3655835	3656035
chr2L	3656397	3656597
chr2L	3656865	3657065
chr2L	3657527	3657727
chr2L	3662375	3662575
chr2L	3771557	3771757
chr2L	3772878	3773078
chr2L	3787003	3787203
chr2L	3789668	3789868
chr2L	3803780	3803980
chr2L	3806241	3806441
chr2L	3825525	3825725
chr2L	3836559	3836759
chr2L	3888806	3889006
chr2L	3896082	3896282
chr2L	4028291	4028491
chr2L	4028850	4029050
chr2L	4197349	4197549
chr2L	4221765	4221965
chr2L	4222471	4222671
chr2L	4281874	4282074
chr2L	4282970	4283170
chr2L	4283595	4283795
chr2L	4301517	4301717
chr2L	4333220	4333420
chr2L	4333761	4333961
chr2L	4371806	4372006
chr2L	4375188	4375388
chr2L	4441184	4441384
chr2L	4595036	4595236
chr2L	4614462	4614662
chr2L	4820525	4820725
chr2L	4820763	4820963
chr2L	4821167	4821367
chr2L	4997661	4997861
chr2L	4998939	4999139
chr2L	5000776	5000976
chr2L	5004864	5005064
chr2L	5030549	5030749
chr2L	5093000	5093200
chr2L	5107740	5107940
chr2L	5108293	5108493
chr2L	5145972	5146172
chr2L	5237348	5237548
chr2L	5293129	5293329
chr2L	5296996	5297196
chr2L	5306498	5306698
chr2L	5403654	5403854
chr2L	5421773	5421973
chr2L	5461284	5461484
chr2L	5542959	5543159
chr2L	5547039	5547239
chr2L	5696874	5697074
chr2L	5724266	5724466
chr2L	5799671	5799871
chr2L	5800128	5800328
chr2L	5805235	5805435
chr2L	5879474	5879674
chr2L	5907297	5907497
chr2L	5925370	5925570
chr2L	5943764	5943964
chr2L	5944548	5944748
chr2L	5977506	5977706
chr2L	5978391	5978591
chr2L	5979655	5979855
chr2L	5980107	5980307
chr2L	5981941	5982141
chr2L	5982454	5982654
chr2L	5983335	5983535
chr2L	5997296	5997496
chr2L	5997960	5998160
chr2L	6054118	6054318
chr2L	6079115	6079315
chr2L	6088499	6088699
chr2L	6178660	6178860
chr2L	6178961	6179161
chr2L	6186545	6186745
chr2L	6252406	6252606
chr2L	6252800	6253000
chr2L	6339293	6339493
chr2L	6479374	6479574
chr2L	6536221	6536421
chr2L	6545269	6545469
chr2L	6601072	6601272
chr2L	6647341	6647541
chr2L	6667827	6668027
chr2L	6786834	6787034
chr2L	6787648	6787848
chr2L	6792094	6792294
chr2L	6793720	6793920
chr2L	6794149	6794349
chr2L	6794561	6794761
chr2L	6833657	6833857
chr2L	6939822	6940022
chr2L	7003771	7003971
chr2L	7049117	7049317
chr2L	7084580	7084780
chr2L	7110845	7111045
chr2L	7122039	7122239
chr2L	7188689	7188889
chr2L	7219407	7219607
chr2L	7245404	7245604
chr2L	7249461	7249661
chr2L	7418580	7418780
chr2L	7419754	7419954
chr2L	7424957	7425157
chr2L	7437302	7437502
chr2L	7495507	7495707
chr2L	7530493	7530693
chr2L	7530864	7531064
chr2L	7701591	7701791
chr2L	7809688	7809888
chr2L	7811352	7811552
chr2L	7828225	7828425
chr2L	7828951	7829151
chr2L	7832817	7833017
chr2L	7855293	7855493
chr2L	7887121	7887321
chr2L	7887448	7887648
chr2L	7976806	7977006
chr2L	7984213	7984413
chr2L	7991683	7991883
chr2L	7994039	7994239
chr2L	7994437	7994637
chr2L	8010676	8010876
chr2L	8030945	8031145
chr2L	8031718	8031918
chr2L	8083666	8083866
chr2L	8084686	8084886
chr2L	8088455	8088655
chr2L	8104122	8104322
chr2L	8162928	8163128
chr2L	8205335	8205535
chr2L	8277653	8277853
chr2L	8278278	8278478
chr2L	8300752	8300952
chr2L	8411555	8411755
chr2L	8416427	8416627
chr2L	8420267	8420467
chr2L	8424896	8425096
chr2L	8478532	8478732
chr2L	8522002	8522202
chr2L	8535082	8535282
chr2L	8535604	8535804
chr2L	8535993	8536193
chr2L	8542319	8542519
chr2L	8542732	8542932
chr2L	8543199	8543399
chr2L	8544036	8544236
chr2L	8587933	8588133
chr2L	8691655	8691855
chr2L	8709016	8709216
chr2L	8718041	8718241
chr2L	8735757	8735957
chr2L	8739980	8740180
chr2L	8825478	8825678
chr2L	8898547	8898747
chr2L	8949922	8950122
chr2L	8951174	8951374
chr2L	8951460	8951660
chr2L	8958270	8958470
chr2L	8984880	8985080
chr2L	9175325	9175525
chr2L	9176173	9176373
chr2L	9176782	9176982
chr2L	9179419	9179619
chr2L	9182706	9182906
chr2L	9203566	9203766
chr2L	9205218	9205418
chr2L	9416350	9416550
chr2L	9437300	9437500
chr2L	9448330	9448530
chr2L	9449241	9449441
chr2L	9449682	9449882
chr2L	9493965	9494165
chr2L	9521639	9521839
chr2L	9522949	9523149
chr2L	9566264	9566464
chr2L	9567604	9567804
chr2L	9568411	9568611
chr2L	9568745	9568945
chr2L	9581716	9581916
chr2L	9608097	9608297
chr2L	9613266	9613466
chr2L	9705957	9706157
chr2L	9723544	9723744
chr2L	9744715	9744915
chr2L	9782158	9782358
chr2L	9863585	9863785
chr2L	9874645	9874845
chr2L	9929169	9929369
chr2L	10009942	10010142
chr2L	10353929	10354129
chr2L	10457540	10457740
chr2L	10756299	10756499
chr2L	10757074	10757274
chr2L	10967361	10967561
chr2L	11045210	11045410
chr2L	11057361	11057561
chr2L	11057749	11057949
chr2L	11067017	11067217
chr2L	11167257	11167457
chr2L	11168784	11168984
chr2L	11206838	11207038
chr2L	11271713	11271913
chr2L	11358595	11358795
chr2L	11445738	11445938
chr2L	11447800	11448000
chr2L	11581738	11581938
chr2L	11804809	11805009
chr2L	11807061	11807261
chr2L	11807619	11807819
chr2L	11807981	11808181
chr2L	11808757	11808957
chr2L	11809306	11809506
chr2L	11968964	11969164
chr2L	11971147	11971347
chr2L	12044684	12044884
chr2L	12055945	12056145
chr2L	12065972	12066172
chr2L	12108768	12108968
chr2L	12114112	12114312
chr2L	12288618	12288818
chr2L	12366108	12366308
chr2L	12421852	12422052
chr2L	12459936	12460136
chr2L	12461233	12461433
chr2L	12483042	12483242
chr2L	12483599	12483799
chr2L	12484245	12484445
chr2L	12504208	12504408
chr2L	12504889	12505089
chr2L	12507678	12507878
chr2L	12521119	12521319
chr2L	12529758	12529958
chr2L	12543249	12543449
chr2L	12543993	12544193
chr2L	12545793	12545993
chr2L	12587117	12587317
chr2L	12618154	12618354
chr2L	12618504	12618704
chr2L	12655812	12656012
chr2L	12678385	12678585
chr2L	12822798	12822998
chr2L	12854610	12854810
chr2L	12975006	12975206
chr2L	13060149	13060349
chr2L	13165777	13165977
chr2L	13290636	13290836
chr2L	13489555	13489755
chr2L	13512756	13512956
chr2L	13513402	13513602
chr2L	13550433	13550633
chr2L	13550720	13550920
chr2L	13666064	13666264
chr2L	13878071	13878271
chr2L	13878883	13879083
chr2L	14023782	14023982
chr2L	14051623	14051823
chr2L	14054333	14054533
chr2L	14233405	14233605
chr2L	14234061	14234261
chr2L	14234558	14234758
chr2L	14385305	14385505
chr2L	14409621	14409821
chr2L	14490644	14490844
chr2L	14508943	14509143
chr2L	14689529	14689729
chr2L	14939879	14940079
chr2L	14995571	14995771
chr2L	14997478	14997678
chr2L	15013590	15013790
chr2L	15057060	15057260
chr2L	15109223	15109423
chr2L	15111335	15111535
chr2L	15264624	15264824
chr2L	15332682	15332882
chr2L	15333634	15333834
chr2L	15426030	15426230
chr2L	15467163	15467363
chr2L	15478354	15478554
chr2L	15492056	15492256
chr2L	15499499	15499699
chr2L	15745634	15745834
chr2L	15747533	15747733
chr2L	15748072	15748272
chr2L	15762600	15762800
chr2L	15911819	15912019
chr2L	16049745	16049945
chr2L	16231324	16231524
chr2L	16234871	16235071
chr2L	16251759	16251959
chr2L	16268080	16268280
chr2L	16269425	16269625
chr2L	16276838	16277038
chr2L	16284689	16284889
chr2L	16286132	16286332
chr2L	16287349	16287549
chr2L	16299551	16299751
chr2L	16325841	16326041
chr2L	16422734	16422934
chr2L	16486303	16486503
chr2L	16496561	16496761
chr2L	16520204	16520404
chr2L	16521419	16521619
chr2L	16526291	16526491
chr2L	16532984	16533184
chr2L	16534219	16534419
chr2L	16534972	16535172
chr2L	16535717	16535917
chr2L	16545722	16545922
chr2L	16548233	16548433
chr2L	16587990	16588190
chr2L	16588589	16588789
chr2L	16601473	16601673
chr2L	16619261	16619461
chr2L	16685208	16685408
chr2L	16689789	16689989
chr2L	16716064	16716264
chr2L	16716439	16716639
chr2L	16718745	16718945
chr2L	16720410	16720610
chr2L	16794031	16794231
chr2L	16817453	16817653
chr2L	16857867	16858067
chr2L	16972772	16972972
chr2L	17215705	17215905
chr2L	17382826	17383026
chr2L	17449685	17449885
chr2L	17565864	17566064
chr2L	17589188	17589388
chr2L	17621283	17621483
chr2L	17735698	17735898
chr2L	17751150	17751350
chr2L	17752576	17752776
chr2L	17754272	17754472
chr2L	17778321	17778521
chr2L	18184644	18184844
chr2L	18185209	18185409
chr2L	18444784	18444984
chr2L	18484469	18484669
chr2L	18629226	18629426
chr2L	18782905	18783105
chr2L	18794396	18794596
chr2L	18796153	18796353
chr2L	18845009	18845209
chr2L	18846985	18847185
chr2L	18881304	18881504
chr2L	18917900	18918100
chr2L	19134902	19135102
chr2L	19135338	19135538
chr2L	19136457	19136657
chr2L	19146103	19146303
chr2L	19154879	19155079
chr2L	19158289	19158489
chr2L	19161576	19161776
chr2L	19165213	19165413
chr2L	19362884	19363084
chr2L	19397994	19398194
chr2L	19398308	19398508
chr2L	19398982	19399182
chr2L	19423516	19423716
chr2L	19423860	19424060
chr2L	19426530	19426730
chr2L	19548279	19548479
chr2L	19571888	19572088
chr2L	19572590	19572790
chr2L	19576079	19576279
chr2L	19576526	19576726
chr2L	19764603	19764803
chr2L	19819973	19820173
chr2L	19820687	19820887
chr2L	19917980	19918180
chr2L	19935103	19935303
chr2L	20311013	20311213
chr2L	20494499	20494699
chr2L	20561508	20561708
chr2L	20562018	20562218
chr2L	20638380	20638580
chr2L	20714599	20714799
chr2L	20774329	20774529
chr2L	20793539	20793739
chr2L	20793879	20794079
chr2L	20821713	20821913
chr2L	20890350	20890550
chr2L	20944989	20945189
chr2L	21052071	21052271
chr2L	21096731	21096931
chr2L	21105190	21105390
chr2L	21141819	21142019
chr2L	21151248	21151448
chr2L	21178620	21178820
chr2L	21221875	21222075
chr2L	21237110	21237310
chr2L	21237741	21237941
chr2L	21250713	21250913
chr2L	21570708	21570908
chr2L	21571703	21571903
chr2L	21572892	21573092
chr2L	21618062	21618262
chr2L	21618749	21618949
chr2L	21629830	21630030
chr2L	21633182	21633382
chr2L	21725766	21725966
chr2L	21753700	21753900
chr2L	21794667	21794867
chr2L	21795360	21795560
chr2L	21828419	21828619
chr2L	21851577	21851777
chr2L	21899394	21899594
chr2L	22019055	22019255
chr2L	22024303	22024503
chr2L	22078574	22078774
chr2L	22134194	22134394
chr2L	22756344	22756544
chr2L	23512758	23512958
chr2R	870307	870507
chr2R	4709128	4709328
chr2R	5089469	5089669
chr2R	5726885	5727085
chr2R	5773111	5773311
chr2R	5782299	5782499
chr2R	5782802	5783002
chr2R	5893636	5893836
chr2R	5992722	5992922
chr2R	6102467	6102667
chr2R	6120499	6120699
chr2R	6132002	6132202
chr2R	6133131	6133331
chr2R	6133531	6133731
chr2R	6156346	6156546
chr2R	6157047	6157247
chr2R	6159000	6159200
chr2R	6168326	6168526
chr2R	6193820	6194020
chr2R	6196240	6196440
chr2R	6220362	6220562
chr2R	6220922	6221122
chr2R	6236048	6236248
chr2R	6501623	6501823
chr2R	6575100	6575300
chr2R	6605968	6606168
chr2R	6610274	6610474
chr2R	6613116	6613316
chr2R	6628278	6628478
chr2R	6630468	6630668
chr2R	6631497	6631697
chr2R	6632388	6632588
chr2R	6828186	6828386
chr2R	6871770	6871970
chr2R	6872009	6872209
chr2R	6872586	6872786
chr2R	6878594	6878794
chr2R	6885728	6885928
chr2R	6992749	6992949
chr2R	7040004	7040204
chr2R	7049663	7049863
chr2R	7146923	7147123
chr2R	7150532	7150732
chr2R	7170939	7171139
chr2R	7248967	7249167
chr2R	7326826	7327026
chr2R	7352494	7352694
chr2R	7381860	7382060
chr2R	7418556	7418756
chr2R	7419149	7419349
chr2R	7457493	7457693
chr2R	7488733	7488933
chr2R	7489763	7489963
chr2R	7490449	7490649
chr2R	7492306	7492506
chr2R	7530881	7531081
chr2R	7544341	7544541
chr2R	7544977	7545177
chr2R	7597745	7597945
chr2R	7665682	7665882
chr2R	7692801	7693001
chr2R	7699365	7699565
chr2R	7722636	7722836
chr2R	7723016	7723216
chr2R	7745294	7745494
chr2R	7755696	7755896
chr2R	7779838	7780038
chr2R	7885979	7886179
chr2R	8061068	8061268
chr2R	8064993	8065193
chr2R	8065392	8065592
chr2R	8083310	8083510
chr2R	8145936	8146136
chr2R	8152086	8152286
chr2R	8174504	8174704
chr2R	8174887	8175087
chr2R	8232280	8232480
chr2R	8237149	8237349
chr2R	8237681	8237881
chr2R	8241964	8242164
chr2R	8272770	8272970
chr2R	8301717	8301917
chr2R	8327163	8327363
chr2R	8462450	8462650
chr2R	8632484	8632684
chr2R	8647897	8648097
chr2R	8649412	8649612
chr2R	8650022	8650222
chr2R	8665982	8666182
chr2R	8667619	8667819
chr2R	8668784	8668984
chr2R	8670452	8670652
chr2R	8724420	8724620
chr2R	8798289	8798489
chr2R	8862535	8862735
chr2R	8985577	8985777
chr2R	9056313	9056513
chr2R	9231290	9231490
chr2R	9274986	9275186
chr2R	9275540	9275740
chr2R	9278920	9279120
chr2R	9284184	9284384
chr2R	9292565	9292765
chr2R	9308383	9308583
chr2R	9376710	9376910
chr2R	9389917	9390117
chr2R	9408922	9409122
chr2R	9413426	9413626
chr2R	9414156	9414356
chr2R	9426907	9427107
chr2R	9440925	9441125
chr2R	9441519	9441719
chr2R	9442006	9442206
chr2R	9443094	9443294
chr2R	9519098	9519298
chr2R	9519638	9519838
chr2R	9520754	9520954
chr2R	9521339	9521539
chr2R	9540469	9540669
chr2R	9548181	9548381
chr2R	9552898	9553098
chr2R	9553869	9554069
chr2R	9683817	9684017
chr2R	9711622	9711822
chr2R	9712158	9712358
chr2R	9712618	9712818
chr2R	9820094	9820294
chr2R	9860710	9860910
chr2R	9861857	9862057
chr2R	9875129	9875329
chr2R	9929757	9929957
chr2R	9949485	9949685
chr2R	9955157	9955357
chr2R	9958100	9958300
chr2R	9979089	9979289
chr2R	9988456	9988656
chr2R	10025299	10025499
chr2R	10026005	10026205
chr2R	10056662	10056862
chr2R	10057734	10057934
chr2R	10078217	10078417
chr2R	10100842	10101042
chr2R	10101602	10101802
chr2R	10124099	10124299
chr2R	10134695	10134895
chr2R	10158486	10158686
chr2R	10159779	10159979
chr2R	10211415	10211615
chr2R	10214128	10214328
chr2R	10219664	10219864
chr2R	10225111	10225311
chr2R	10227993	10228193
chr2R	10238335	10238535
chr2R	10239179	10239379
chr2R	10418180	10418380
chr2R	10421353	10421553
chr2R	10421901	10422101
chr2R	10423218	10423418
chr2R	10423960	10424160
chr2R	10428563	10428763
chr2R	10428978	10429178
chr2R	10430430	10430630
chr2R	10432427	10432627
chr2R	10437934	10438134
chr2R	10444169	10444369
chr2R	10477840	10478040
chr2R	10478493	10478693
chr2R	10485476	10485676
chr2R	10486760	10486960
chr2R	10534206	10534406
chr2R	10535071	10535271
chr2R	10536122	10536322
chr2R	10540537	10540737
chr2R	10540984	10541184
chr2R	10541631	10541831
chr2R	10542340	10542540
chr2R	10542885	10543085
chr2R	10551893	10552093
chr2R	10554042	10554242
chr2R	10555275	10555475
chr2R	10558664	10558864
chr2R	10559750	10559950
chr2R	10566571	10566771
chr2R	10569470	10569670
chr2R	10596309	10596509
chr2R	10617499	10617699
chr2R	10618470	10618670
chr2R	10675071	10675271
chr2R	10781996	10782196
chr2R	10782774	10782974
chr2R	10798706	10798906
chr2R	10805093	10805293
chr2R	10806561	10806761
chr2R	10807337	10807537
chr2R	11072901	11073101
chr2R	11107514	11107714
chr2R	11116408	11116608
chr2R	11145070	11145270
chr2R	11173598	11173798
chr2R	11175235	11175435
chr2R	11184180	11184380
chr2R	11185303	11185503
chr2R	11185751	11185951
chr2R	11197199	11197399
chr2R	11198702	11198902
chr2R	11202262	11202462
chr2R	11203274	11203474
chr2R	11231947	11232147
chr2R	11232451	11232651
chr2R	11232832	11233032
chr2R	11366725	11366925
chr2R	11367407	11367607
chr2R	11397395	11397595
chr2R	11450725	11450925
chr2R	11475545	11475745
chr2R	11493964	11494164
chr2R	11528077	11528277
chr2R	11529554	11529754
chr2R	11592397	11592597
chr2R	11593093	11593293
chr2R	11597829	11598029
chr2R	11603480	11603680
chr2R	11605044	11605244
chr2R	11615967	11616167
chr2R	11626498	11626698
chr2R	11633490	11633690
chr2R	11635233	11635433
chr2R	11637285	11637485
chr2R	11637508	11637708
chr2R	11639541	11639741
chr2R	11648499	11648699
chr2R	11650929	11651129
chr2R	11662847	11663047
chr2R	11665529	11665729
chr2R	11666672	11666872
chr2R	11756488	11756688
chr2R	11757698	11757898
chr2R	11892874	11893074
chr2R	11997428	11997628
chr2R	12019799	12019999
chr2R	12025234	12025434
chr2R	12054801	12055001
chr2R	12101176	12101376
chr2R	12102394	12102594
chr2R	12111242	12111442
chr2R	12119075	12119275
chr2R	12212591	12212791
chr2R	12249554	12249754
chr2R	12252872	12253072
chr2R	12259225	12259425
chr2R	12261345	12261545
chr2R	12453221	12453421
chr2R	12454080	12454280
chr2R	12474170	12474370
chr2R	12587035	12587235
chr2R	12588265	12588465
chr2R	12589111	12589311
chr2R	12589556	12589756
chr2R	12591704	12591904
chr2R	12592382	12592582
chr2R	12686721	12686921
chr2R	12687262	12687462
chr2R	12704980	12705180
chr2R	12743170	12743370
chr2R	12780290	12780490
chr2R	12886776	12886976
chr2R	12904441	12904641
chr2R	12947738	12947938
chr2R	12955940	12956140
chr2R	12958659	12958859
chr2R	12980734	12980934
chr2R	12984600	12984800
chr2R	12985743	12985943
chr2R	12991782	12991982
chr2R	12996320	12996520
chr2R	12997010	12997210
chr2R	13015663	13015863
chr2R	13035329	13035529
chr2R	13038771	13038971
chr2R	13041620	13041820
chr2R	13042087	13042287
chr2R	13189262	13189462
chr2R	13190045	13190245
chr2R	13191504	13191704
chr2R	13219239	13219439
chr2R	13223665	13223865
chr2R	13337342	13337542
chr2R	13449369	13449569
chr2R	13449899	13450099
chr2R	13502007	13502207
chr2R	13539729	13539929
chr2R	13566033	13566233
chr2R	13592976	13593176
chr2R	13620189	13620389
chr2R	13621307	13621507
chr2R	13622824	13623024
chr2R	13822766	13822966
chr2R	13824177	13824377
chr2R	13826244	13826444
chr2R	13826586	13826786
chr2R	13829253	13829453
chr2R	13897680	13897880
chr2R	13924139	13924339
chr2R	13925501	13925701
chr2R	13926060	13926260
chr2R	13934733	13934933
chr2R	13939758	13939958
chr2R	13941131	13941331
chr2R	13957554	13957754
chr2R	13958078	13958278
chr2R	13991760	13991960
chr2R	13992468	13992668
chr2R	14000939	14001139
chr2R	14006753	14006953
chr2R	14007128	14007328
chr2R	14008321	14008521
chr2R	14024683	14024883
chr2R	14031285	14031485
chr2R	14041124	14041324
chr2R	14139913	14140113
chr2R	14140864	14141064
chr2R	14275364	14275564
chr2R	14307255	14307455
chr2R	14307991	14308191
chr2R	14332200	14332400
chr2R	14432162	14432362
chr2R	14435687	14435887
chr2R	14449021	14449221
chr2R	14458308	14458508
chr2R	14481436	14481636
chr2R	14481918	14482118
chr2R	14526468	14526668
chr2R	14526912	14527112
chr2R	14713595	14713795
chr2R	14715843	14716043
chr2R	14755760	14755960
chr2R	14765540	14765740
chr2R	14768683	14768883
chr2R	14799084	14799284
chr2R	14799553	14799753
chr2R	14814320	14814520
chr2R	14908241	14908441
chr2R	14928165	14928365
chr2R	14933872	14934072
chr2R	14954525	14954725
chr2R	14958431	14958631
chr2R	14959024	14959224
chr2R	14962432	14962632
chr2R	14964636	14964836
chr2R	14965490	14965690
chr2R	14970159	14970359
chr2R	14981804	14982004
chr2R	15010724	15010924
chr2R	15116341	15116541
chr2R	15128312	15128512
chr2R	15135281	15135481
chr2R	15252469	15252669
chr2R	15308399	15308599
chr2R	15349544	15349744
chr2R	15350020	15350220
chr2R	15425010	15425210
chr2R	15549964	15550164
chr2R	15600415	15600615
chr2R	15609977	15610177
chr2R	15610935	15611135
chr2R	15613675	15613875
chr2R	15648802	15649002
chr2R	15675368	15675568
chr2R	15675980	15676180
chr2R	15676571	15676771
chr2R	15735294	15735494
chr2R	15813767	15813967
chr2R	15817001	15817201
chr2R	15890877	15891077
chr2R	15931341	15931541
chr2R	15931802	15932002
chr2R	16031245	16031445
chr2R	16031768	16031968
chr2R	16103125	16103325
chr2R	16104408	16104608
chr2R	16111031	16111231
chr2R	16130191	16130391
chr2R	16161943	16162143
chr2R	16180055	16180255
chr2R	16187696	16187896
chr2R	16206539	16206739
chr2R	16210393	16210593
chr2R	16221191	16221391
chr2R	16270460	16270660
chr2R	16335873	16336073
chr2R	16338925	16339125
chr2R	16376927	16377127
chr2R	16386318	16386518
chr2R	16499865	16500065
chr2R	16552099	16552299
chr2R	16579345	16579545
chr2R	16579859	16580059
chr2R	16580612	16580812
chr2R	16583446	16583646
chr2R	16583833	16584033
chr2R	16585619	16585819
chr2R	16594730	16594930
chr2R	16607864	16608064
chr2R	16608935	16609135
chr2R	16611649	16611849
chr2R	16611973	16612173
chr2R	16764401	16764601
chr2R	16856471	16856671
chr2R	16857108	16857308
chr2R	17028298	17028498
chr2R	17097389	17097589
chr2R	17265334	17265534
chr2R	17302664	17302864
chr2R	17335791	17335991
chr2R	17420826	17421026
chr2R	17458605	17458805
chr2R	17462264	17462464
chr2R	17476261	17476461
chr2R	17548310	17548510
chr2R	17593119	17593319
chr2R	17639087	17639287
chr2R	17716486	17716686
chr2R	17717393	17717593
chr2R	17719133	17719333
chr2R	17794173	17794373
chr2R	17796119	17796319
chr2R	17801023	17801223
chr2R	17801697	17801897
chr2R	17802492	17802692
chr2R	17804168	17804368
chr2R	17813974	17814174
chr2R	17821082	17821282
chr2R	17851497	17851697
chr2R	18008568	18008768
chr2R	18062005	18062205
chr2R	18128409	18128609
chr2R	18141133	18141333
chr2R	18156869	18157069
chr2R	18171478	18171678
chr2R	18229761	18229961
chr2R	18230464	18230664
chr2R	18231181	18231381
chr2R	18232574	18232774
chr2R	18288727	18288927
chr2R	18309698	18309898
chr2R	18355676	18355876
chr2R	18356035	18356235
chr2R	18356417	18356617
chr2R	18357558	18357758
chr2R	18377474	18377674
chr2R	18401835	18402035
chr2R	18404448	18404648
chr2R	18406780	18406980
chr2R	18413587	18413787
chr2R	18442623	18442823
chr2R	18503450	18503650
chr2R	18514864	18515064
chr2R	18583296	18583496
chr2R	18611764	18611964
chr2R	18652870	18653070
chr2R	18673464	18673664
chr2R	18717392	18717592
chr2R	18717901	18718101
chr2R	18799358	18799558
chr2R	18800452	18800652
chr2R	18802400	18802600
chr2R	18802679	18802879
chr2R	18806126	18806326
chr2R	18846203	18846403
chr2R	18877939	18878139
chr2R	19141985	19142185
chr2R	19143046	19143246
chr2R	19144005	19144205
chr2R	19179050	19179250
chr2R	19228954	19229154
chr2R	19229766	19229966
chr2R	19231251	19231451
chr2R	19275520	19275720
chr2R	19293120	19293320
chr2R	19325455	19325655
chr2R	19356516	19356716
chr2R	19373196	19373396
chr2R	19395054	19395254
chr2R	19411343	19411543
chr2R	19424107	19424307
chr2R	19449988	19450188
chr2R	19455690	19455890
chr2R	19456983	19457183
chr2R	19467260	19467460
chr2R	19468186	19468386
chr2R	19630685	19630885
chr2R	19631452	19631652
chr2R	19631901	19632101
chr2R	19655783	19655983
chr2R	19669044	19669244
chr2R	19825705	19825905
chr2R	19826327	19826527
chr2R	20106483	20106683
chr2R	20111157	20111357
chr2R	20320102	20320302
chr2R	20327598	20327798
chr2R	20494916	20495116
chr2R	20511114	20511314
chr2R	20582080	20582280
chr2R	20582657	20582857
chr2R	20587962	20588162
chr2R	20596171	20596371
chr2R	20598133	20598333
chr2R	20665626	20665826
chr2R	20697816	20698016
chr2R	20698282	20698482
chr2R	20836001	20836201
chr2R	20836286	20836486
chr2R	20888683	20888883
chr2R	20896333	20896533
chr2R	20907330	20907530
chr2R	20914226	20914426
chr2R	20916209	20916409
chr2R	20916554	20916754
chr2R	20919855	20920055
chr2R	20933047	20933247
chr2R	20943456	20943656
chr2R	20961052	20961252
chr2R	20996993	20997193
chr2R	20998017	20998217
chr2R	21047785	21047985
chr2R	21056765	21056965
chr2R	21075973	21076173
chr2R	21101670	21101870
chr2R	21127965	21128165
chr2R	21193335	21193535
chr2R	21199838	21200038
chr2R	21201117	21201317
chr2R	21202736	21202936
chr2R	21251042	21251242
chr2R	21364532	21364732
chr2R	21379399	21379599
chr2R	21450447	21450647
chr2R	21475081	21475281
chr2R	21475988	21476188
chr2R	21480777	21480977
chr2R	21497463	21497663
chr2R	21501939	21502139
chr2R	21502615	21502815
chr2R	21522220	21522420
chr2R	21545501	21545701
chr2R	21546478	21546678
chr2R	21550313	21550513
chr2R	21552674	21552874
chr2R	21571468	21571668
chr2R	21579922	21580122
chr2R	21646005	21646205
chr2R	21646575	21646775
chr2R	21709492	21709692
chr2R	21712307	21712507
chr2R	21713177	21713377
chr2R	21713807	21714007
chr2R	21714654	21714854
chr2R	21720569	21720769
chr2R	21871700	21871900
chr2R	22047198	22047398
chr2R	22080335	22080535
chr2R	22136805	22137005
chr2R	22213065	22213265
chr2R	22242152	22242352
chr2R	22243103	22243303
chr2R	22243681	22243881
chr2R	22256349	22256549
chr2R	22270647	22270847
chr2R	22373188	22373388
chr2R	22382894	22383094
chr2R	22402022	22402222
chr2R	22403481	22403681
chr2R	22514126	22514326
chr2R	22514380	22514580
chr2R	22569739	22569939
chr2R	22570239	22570439
chr2R	22592936	22593136
chr2R	22678501	22678701
chr2R	22686069	22686269
chr2R	22688983	22689183
chr2R	22689672	22689872
chr2R	22729250	22729450
chr2R	22743550	22743750
chr2R	22796884	22797084
chr2R	22860253	22860453
chr2R	22867792	22867992
chr2R	22896033	22896233
chr2R	22934286	22934486
chr2R	23045998	23046198
chr2R	23203920	23204120
chr2R	23395389	23395589
chr2R	23426034	23426234
chr2R	23551767	23551967
chr2R	23573223	23573423
chr2R	23580065	23580265
chr2R	23580695	23580895
chr2R	23659085	23659285
chr2R	23666850	23667050
chr2R	23697790	23697990
chr2R	23713605	23713805
chr2R	23796373	23796573
chr2R	23910188	23910388
chr2R	23978565	23978765
chr2R	24229820	24230020
chr2R	24293308	24293508
chr2R	24293939	24294139
chr2R	24342678	24342878
chr2R	24369736	24369936
chr2R	24389513	24389713
chr2R	24390257	24390457
chr2R	24525719	24525919
chr2R	24543417	24543617
chr2R	24630897	24631097
chr2R	24712825	24713025
chr2R	24727637	24727837
chr2R	24736688	24736888
chr2R	24744144	24744344
chr2R	24749690	24749890
chr2R	24768165	24768365
chr2R	24793383	24793583
chr2R	24813733	24813933
chr2R	24814579	24814779
chr2R	24891403	24891603
chr2R	24964296	24964496
chr2R	24986830	24987030
chr2R	25010679	25010879
chr2R	25052401	25052601
chr2R	25061732	25061932
chr2R	25072823	25073023
chr2R	25084410	25084610
chr2R	25114330	25114530
chr2R	25215166	25215366
chr2R	25225780	25225980
chr2R	25226414	25226614
chr2R	25257456	25257656
chr3L	40369	40569
chr3L	128479	128679
chr3L	129272	129472
chr3L	131353	131553
chr3L	132446	132646
chr3L	140890	141090
chr3L	178579	178779
chr3L	180130	180330
chr3L	271487	271687
chr3L	347765	347965
chr3L	377348	377548
chr3L	378123	378323
chr3L	392946	393146
chr3L	445842	446042
chr3L	490697	490897
chr3L	492600	492800
chr3L	539371	539571
chr3L	540183	540383
chr3L	543354	543554
chr3L	544201	544401
chr3L	545921	546121
chr3L	603971	604171
chr3L	616766	616966
chr3L	630020	630220
chr3L	648602	648802
chr3L	673482	673682
chr3L	682431	682631
chr3L	685505	685705
chr3L	707854	708054
chr3L	708147	708347
chr3L	739119	739319
chr3L	748506	748706
chr3L	749250	749450
chr3L	769288	769488
chr3L	872038	872238
chr3L	880999	881199
chr3L	881968	882168
chr3L	959487	959687
chr3L	1098790	1098990
chr3L	1102430	1102630
chr3L	1177280	1177480
chr3L	1178072	1178272
chr3L	1196121	1196321
chr3L	1208249	1208449
chr3L	1265593	1265793
chr3L	1298591	1298791
chr3L	1335390	1335590
chr3L	1336212	1336412
chr3L	1349553	1349753
chr3L	1366973	1367173
chr3L	1463669	1463869
chr3L	1489521	1489721
chr3L	1546319	1546519
chr3L	1546804	1547004
chr3L	1577482	1577682
chr3L	1586469	1586669
chr3L	1592984	1593184
chr3L	1637003	1637203
chr3L	1648867	1649067
chr3L	1746857	1747057
chr3L	1794705	1794905
chr3L	1861655	1861855
chr3L	1882710	1882910
chr3L	1883264	1883464
chr3L	1885466	1885666
chr3L	1919629	1919829
chr3L	1920186	1920386
chr3L	1921016	1921216
chr3L	1967488	1967688
chr3L	2107477	2107677
chr3L	2151735	2151935
chr3L	2182224	2182424
chr3L	2228559	2228759
chr3L	2229073	2229273
chr3L	2411446	2411646
chr3L	2466648	2466848
chr3L	2490038	2490238
chr3L	2553245	2553445
chr3L	2585911	2586111
chr3L	2589943	2590143
chr3L	2712623	2712823
chr3L	2808282	2808482
chr3L	2821118	2821318
chr3L	2823505	2823705
chr3L	2824813	2825013
chr3L	2828901	2829101
chr3L	2896457	2896657
chr3L	3060200	3060400
chr3L	3069893	3070093
chr3L	3070617	3070817
chr3L	3074046	3074246
chr3L	3081187	3081387
chr3L	3149407	3149607
chr3L	3226204	3226404
chr3L	3249893	3250093
chr3L	3250383	3250583
chr3L	3267226	3267426
chr3L	3270051	3270251
chr3L	3301165	3301365
chr3L	3336927	3337127
chr3L	3418021	3418221
chr3L	3418274	3418474
chr3L	3419409	3419609
chr3L	3420280	3420480
chr3L	3452936	3453136
chr3L	3542663	3542863
chr3L	3543553	3543753
chr3L	3545018	3545218
chr3L	3626075	3626275
chr3L	3756865	3757065
chr3L	3757789	3757989
chr3L	3765723	3765923
chr3L	3787194	3787394
chr3L	3789209	3789409
chr3L	3825179	3825379
chr3L	3828215	3828415
chr3L	3963570	3963770
chr3L	3964108	3964308
chr3L	3983688	3983888
chr3L	4062081	4062281
chr3L	4071701	4071901
chr3L	4073909	4074109
chr3L	4133949	4134149
chr3L	4161118	4161318
chr3L	4167436	4167636
chr3L	4227282	4227482
chr3L	4233752	4233952
chr3L	4252217	4252417
chr3L	4253024	4253224
chr3L	4263544	4263744
chr3L	4363569	4363769
chr3L	4380364	4380564
chr3L	4406912	4407112
chr3L	4409945	4410145
chr3L	4430391	4430591
chr3L	4431995	4432195
chr3L	4541944	4542144
chr3L	4542995	4543195
chr3L	4623226	4623426
chr3L	4624520	4624720
chr3L	4625506	4625706
chr3L	4625732	4625932
chr3L	4626081	4626281
chr3L	4692223	4692423
chr3L	4692589	4692789
chr3L	4976314	4976514
chr3L	5184925	5185125
chr3L	5276623	5276823
chr3L	5277120	5277320
chr3L	5277903	5278103
chr3L	5355254	5355454
chr3L	5396861	5397061
chr3L	5611963	5612163
chr3L	5629987	5630187
chr3L	5630604	5630804
chr3L	5634275	5634475
chr3L	5654347	5654547
chr3L	5657659	5657859
chr3L	5664682	5664882
chr3L	5665508	5665708
chr3L	5673240	5673440
chr3L	5691229	5691429
chr3L	5726519	5726719
chr3L	5840459	5840659
chr3L	5881413	5881613
chr3L	5881972	5882172
chr3L	5926595	5926795
chr3L	5976053	5976253
chr3L	6217983	6218183
chr3L	6218594	6218794
chr3L	6256595	6256795
chr3L	6256969	6257169
chr3L	6262659	6262859
chr3L	6263003	6263203
chr3L	6496276	6496476
chr3L	6550998	6551198
chr3L	6552526	6552726
chr3L	6717058	6717258
chr3L	6789929	6790129
chr3L	6814048	6814248
chr3L	6904165	6904365
chr3L	6943384	6943584
chr3L	6964244	6964444
chr3L	6985940	6986140
chr3L	6997559	6997759
chr3L	7134317	7134517
chr3L	7156350	7156550
chr3L	7156954	7157154
chr3L	7203945	7204145
chr3L	7225380	7225580
chr3L	7263932	7264132
chr3L	7345132	7345332
chr3L	7381413	7381613
chr3L	7435232	7435432
chr3L	7781770	7781970
chr3L	7804867	7805067
chr3L	7805398	7805598
chr3L	7808860	7809060
chr3L	7809799	7809999
chr3L	7821723	7821923
chr3L	7847716	7847916
chr3L	7855008	7855208
chr3L	7855529	7855729
chr3L	7856206	7856406
chr3L	7867396	7867596
chr3L	7910968	7911168
chr3L	7947972	7948172
chr3L	7978982	7979182
chr3L	7979980	7980180
chr3L	8004285	8004485
chr3L	8035035	8035235
chr3L	8056373	8056573
chr3L	8063309	8063509
chr3L	8081901	8082101
chr3L	8128406	8128606
chr3L	8455010	8455210
chr3L	8507093	8507293
chr3L	8512587	8512787
chr3L	8546498	8546698
chr3L	8559909	8560109
chr3L	8672820	8673020
chr3L	8675627	8675827
chr3L	8766241	8766441
chr3L	8827305	8827505
chr3L	8978817	8979017
chr3L	9004992	9005192
chr3L	9019395	9019595
chr3L	9125340	9125540
chr3L	9127073	9127273
chr3L	9127755	9127955
chr3L	9128843	9129043
chr3L	9129328	9129528
chr3L	9137715	9137915
chr3L	9155271	9155471
chr3L	9190244	9190444
chr3L	9373599	9373799
chr3L	9377385	9377585
chr3L	9383619	9383819
chr3L	9401130	9401330
chr3L	9401870	9402070
chr3L	9423089	9423289
chr3L	9432004	9432204
chr3L	9462110	9462310
chr3L	9462438	9462638
chr3L	9466019	9466219
chr3L	9505245	9505445
chr3L	9505645	9505845
chr3L	9546998	9547198
chr3L	9614747	9614947
chr3L	9615479	9615679
chr3L	9675697	9675897
chr3L	9678262	9678462
chr3L	9692647	9692847
chr3L	9693572	9693772
chr3L	9694470	9694670
chr3L	9695401	9695601
chr3L	9696877	9697077
chr3L	9751590	9751790
chr3L	9763355	9763555
chr3L	10254375	10254575
chr3L	10289538	10289738
chr3L	10306333	10306533
chr3L	10308065	10308265
chr3L	10325196	10325396
chr3L	10325594	10325794
chr3L	10357931	10358131
chr3L	10515934	10516134
chr3L	10516630	10516830
chr3L	10517694	10517894
chr3L	10567980	10568180
chr3L	10660253	10660453
chr3L	10664571	10664771
chr3L	10665416	10665616
chr3L	10666758	10666958
chr3L	10674250	10674450
chr3L	10674992	10675192
chr3L	10675945	10676145
chr3L	10680922	10681122
chr3L	10681879	10682079
chr3L	10737093	10737293
chr3L	10739417	10739617
chr3L	10740172	10740372
chr3L	10742809	10743009
chr3L	10793584	10793784
chr3L	10811008	10811208
chr3L	10856629	10856829
chr3L	10857451	10857651
chr3L	10999947	11000147
chr3L	11007640	11007840
chr3L	11008902	11009102
chr3L	11009208	11009408
chr3L	11010343	11010543
chr3L	11046645	11046845
chr3L	11084599	11084799
chr3L	11092807	11093007
chr3L	11096403	11096603
chr3L	11096787	11096987
chr3L	11118813	11119013
chr3L	11123996	11124196
chr3L	11197017	11197217
chr3L	11214701	11214901
chr3L	11215115	11215315
chr3L	11215617	11215817
chr3L	11242793	11242993
chr3L	11246047	11246247
chr3L	11247912	11248112
chr3L	11252091	11252291
chr3L	11294810	11295010
chr3L	11296493	11296693
chr3L	11428516	11428716
chr3L	11487321	11487521
chr3L	11493463	11493663
chr3L	11534494	11534694
chr3L	11553347	11553547
chr3L	11557349	11557549
chr3L	11586803	11587003
chr3L	11587668	11587868
chr3L	11596564	11596764
chr3L	11707927	11708127
chr3L	11765094	11765294
chr3L	11766172	11766372
chr3L	11819913	11820113
chr3L	11821952	11822152
chr3L	11832650	11832850
chr3L	11833099	11833299
chr3L	12056413	12056613
chr3L	12081763	12081963
chr3L	12111097	12111297
chr3L	12147057	12147257
chr3L	12163838	12164038
chr3L	12265863	12266063
chr3L	12328907	12329107
chr3L	12434461	12434661
chr3L	12468164	12468364
chr3L	12490084	12490284
chr3L	12515734	12515934
chr3L	12580313	12580513
chr3L	12580924	12581124
chr3L	12609362	12609562
chr3L	12627764	12627964
chr3L	12692962	12693162
chr3L	12693368	12693568
chr3L	12790030	12790230
chr3L	12791001	12791201
chr3L	12804417	12804617
chr3L	12832529	12832729
chr3L	12892486	12892686
chr3L	13113960	13114160
chr3L	13227685	13227885
chr3L	13228479	13228679
chr3L	13236935	13237135
chr3L	13477235	13477435
chr3L	13667343	13667543
chr3L	13884893	13885093
chr3L	13904576	13904776
chr3L	13919957	13920157
chr3L	13920535	13920735
chr3L	13922928	13923128
chr3L	13924005	13924205
chr3L	13925322	13925522
chr3L	13934921	13935121
chr3L	13949517	13949717
chr3L	13991430	13991630
chr3L	13993466	13993666
chr3L	14038276	14038476
chr3L	14108242	14108442
chr3L	14177569	14177769
chr3L	14177964	14178164
chr3L	14201150	14201350
chr3L	14205222	14205422
chr3L	14219740	14219940
chr3L	14272183	14272383
chr3L	14272885	14273085
chr3L	14274105	14274305
chr3L	14409831	14410031
chr3L	14410371	14410571
chr3L	14448591	14448791
chr3L	14476937	14477137
chr3L	14523115	14523315
chr3L	14550936	14551136
chr3L	14551217	14551417
chr3L	14613456	14613656
chr3L	14622621	14622821
chr3L	14624915	14625115
chr3L	14632499	14632699
chr3L	14634648	14634848
chr3L	14660504	14660704
chr3L	14752097	14752297
chr3L	14752828	14753028
chr3L	14753261	14753461
chr3L	14753649	14753849
chr3L	14755168	14755368
chr3L	14756414	14756614
chr3L	14757321	14757521
chr3L	14757958	14758158
chr3L	14758871	14759071
chr3L	14760065	14760265
chr3L	14775763	14775963
chr3L	14781177	14781377
chr3L	14785472	14785672
chr3L	14968344	14968544
chr3L	14969166	14969366
chr3L	14972407	14972607
chr3L	14977650	14977850
chr3L	14987257	14987457
chr3L	15021145	15021345
chr3L	15079415	15079615
chr3L	15090333	15090533
chr3L	15094344	15094544
chr3L	15099155	15099355
chr3L	15104374	15104574
chr3L	15125286	15125486
chr3L	15141823	15142023
chr3L	15146898	15147098
chr3L	15234356	15234556
chr3L	15235461	15235661
chr3L	15329603	15329803
chr3L	15336456	15336656
chr3L	15493948	15494148
chr3L	15494936	15495136
chr3L	15507572	15507772
chr3L	15510867	15511067
chr3L	15511781	15511981
chr3L	15514456	15514656
chr3L	15532410	15532610
chr3L	15534608	15534808
chr3L	15535205	15535405
chr3L	15536026	15536226
chr3L	15588105	15588305
chr3L	15619789	15619989
chr3L	15626098	15626298
chr3L	15699935	15700135
chr3L	15728359	15728559
chr3L	15729348	15729548
chr3L	15815619	15815819
chr3L	15825667	15825867
chr3L	15924861	15925061
chr3L	15988370	15988570
chr3L	16015749	16015949
chr3L	16023269	16023469
chr3L	16029111	16029311
chr3L	16043800	16044000
chr3L	16046854	16047054
chr3L	16047197	16047397
chr3L	16050137	16050337
chr3L	16050684	16050884
chr3L	16052468	16052668
chr3L	16162270	16162470
chr3L	16164278	16164478
chr3L	16164700	16164900
chr3L	16211435	16211635
chr3L	16288453	16288653
chr3L	16408337	16408537
chr3L	16408718	16408918
chr3L	16410640	16410840
chr3L	16411510	16411710
chr3L	16452035	16452235
chr3L	16483620	16483820
chr3L	16484048	16484248
chr3L	16493870	16494070
chr3L	16494561	16494761
chr3L	16572337	16572537
chr3L	16645657	16645857
chr3L	16660116	16660316
chr3L	16660636	16660836
chr3L	16661230	16661430
chr3L	16667936	16668136
chr3L	16713737	16713937
chr3L	16807715	16807915
chr3L	16830006	16830206
chr3L	16845310	16845510
chr3L	16891022	16891222
chr3L	17012085	17012285
chr3L	17148074	17148274
chr3L	17148793	17148993
chr3L	17149910	17150110
chr3L	17211714	17211914
chr3L	17238341	17238541
chr3L	17245714	17245914
chr3L	17421485	17421685
chr3L	17487373	17487573
chr3L	17563688	17563888
chr3L	17570034	17570234
chr3L	17573970	17574170
chr3L	17576530	17576730
chr3L	17577852	17578052
chr3L	17590745	17590945
chr3L	17606896	17607096
chr3L	17612046	17612246
chr3L	17619382	17619582
chr3L	17653297	17653497
chr3L	17653970	17654170
chr3L	17658654	17658854
chr3L	17659074	17659274
chr3L	17668065	17668265
chr3L	17668820	17669020
chr3L	17740399	17740599
chr3L	17757435	17757635
chr3L	17764148	17764348
chr3L	17856727	17856927
chr3L	17857254	17857454
chr3L	17878908	17879108
chr3L	17961790	17961990
chr3L	17962241	17962441
chr3L	17964867	17965067
chr3L	17968753	17968953
chr3L	17971198	17971398
chr3L	17972521	17972721
chr3L	17973073	17973273
chr3L	17974701	17974901
chr3L	17986504	17986704
chr3L	17988664	17988864
chr3L	17989348	17989548
chr3L	17989943	17990143
chr3L	17993430	17993630
chr3L	17995473	17995673
chr3L	17999479	17999679
chr3L	17999877	18000077
chr3L	18005333	18005533
chr3L	18016657	18016857
chr3L	18022109	18022309
chr3L	18022777	18022977
chr3L	18029549	18029749
chr3L	18063294	18063494
chr3L	18064832	18065032
chr3L	18077882	18078082
chr3L	18139195	18139395
chr3L	18167168	18167368
chr3L	18185632	18185832
chr3L	18186233	18186433
chr3L	18186886	18187086
chr3L	18221114	18221314
chr3L	18234218	18234418
chr3L	18304559	18304759
chr3L	18345311	18345511
chr3L	18398413	18398613
chr3L	18439951	18440151
chr3L	18539823	18540023
chr3L	18640737	18640937
chr3L	18753904	18754104
chr3L	18757164	18757364
chr3L	18765838	18766038
chr3L	18771491	18771691
chr3L	18787934	18788134
chr3L	18792895	18793095
chr3L	18800424	18800624
chr3L	18822762	18822962
chr3L	18834828	18835028
chr3L	18840504	18840704
chr3L	18841201	18841401
chr3L	18846212	18846412
chr3L	18867628	18867828
chr3L	18890506	18890706
chr3L	18890948	18891148
chr3L	18947091	18947291
chr3L	19045421	19045621
chr3L	19081472	19081672
chr3L	19086415	19086615
chr3L	19086978	19087178
chr3L	19170621	19170821
chr3L	19171690	19171890
chr3L	19230750	19230950
chr3L	19292545	19292745
chr3L	19292876	19293076
chr3L	19293300	19293500
chr3L	19294886	19295086
chr3L	19432343	19432543
chr3L	19559449	19559649
chr3L	19562224	19562424
chr3L	19580802	19581002
chr3L	19635613	19635813
chr3L	19663507	19663707
chr3L	19791435	19791635
chr3L	19793604	19793804
chr3L	19833313	19833513
chr3L	19895607	19895807
chr3L	19896410	19896610
chr3L	19896968	19897168
chr3L	19897518	19897718
chr3L	19907069	19907269
chr3L	19908346	19908546
chr3L	19908850	19909050
chr3L	19910130	19910330
chr3L	19929188	19929388
chr3L	19939029	19939229
chr3L	20104268	20104468
chr3L	20105237	20105437
chr3L	20109848	20110048
chr3L	20186628	20186828
chr3L	20198283	20198483
chr3L	20295184	20295384
chr3L	20310504	20310704
chr3L	20348674	20348874
chr3L	20349441	20349641
chr3L	20398687	20398887
chr3L	20401625	20401825
chr3L	20441789	20441989
chr3L	20442994	20443194
chr3L	20493852	20494052
chr3L	20508093	20508293
chr3L	20517470	20517670
chr3L	20540377	20540577
chr3L	20620800	20621000
chr3L	20621686	20621886
chr3L	20695473	20695673
chr3L	20730334	20730534
chr3L	20784583	20784783
chr3L	20785334	20785534
chr3L	20922306	20922506
chr3L	20949540	20949740
chr3L	21007706	21007906
chr3L	21008044	21008244
chr3L	21008946	21009146
chr3L	21009484	21009684
chr3L	21009844	21010044
chr3L	21011090	21011290
chr3L	21011609	21011809
chr3L	21014790	21014990
chr3L	21023414	21023614
chr3L	21025207	21025407
chr3L	21025656	21025856
chr3L	21026316	21026516
chr3L	21047828	21048028
chr3L	21049496	21049696
chr3L	21058666	21058866
chr3L	21060272	21060472
chr3L	21100063	21100263
chr3L	21186589	21186789
chr3L	21202853	21203053
chr3L	21225779	21225979
chr3L	21239988	21240188
chr3L	21277000	21277200
chr3L	21346752	21346952
chr3L	21476702	21476902
chr3L	21479663	21479863
chr3L	21509688	21509888
chr3L	21584785	21584985
chr3L	21598469	21598669
chr3L	21604504	21604704
chr3L	21644728	21644928
chr3L	21800398	21800598
chr3L	21808153	21808353
chr3L	21843408	21843608
chr3L	21879424	21879624
chr3L	21880531	21880731
chr3L	21916331	21916531
chr3L	21955023	21955223
chr3L	22132797	22132997
chr3L	22134182	22134382
chr3L	22134614	22134814
chr3L	22135927	22136127
chr3L	22346800	22347000
chr3L	22407851	22408051
chr3L	22494077	22494277
chr3L	22722667	22722867
chr3L	22727980	22728180
chr3L	22773409	22773609
chr3L	22788042	22788242
chr3L	22822547	22822747
chr3L	22824792	22824992
chr3L	22835444	22835644
chr3L	22839699	22839899
chr3L	22851277	22851477
chr3L	22909442	22909642
chr3L	22910283	22910483
chr3L	22945374	22945574
chr3L	22948420	22948620
chr3L	22960435	22960635
chr3L	23317236	23317436
chr3L	24021231	24021431
chr3L	24210274	24210474
chr3L	25229987	25230187
chr3L	25443765	25443965
chr3R	3344816	3345016
chr3R	3788776	3788976
chr3R	4051925	4052125
chr3R	4174454	4174654
chr3R	4175187	4175387
chr3R	4197158	4197358
chr3R	4307737	4307937
chr3R	4360929	4361129
chr3R	4378732	4378932
chr3R	4419571	4419771
chr3R	4433529	4433729
chr3R	4452436	4452636
chr3R	4453288	4453488
chr3R	4478291	4478491
chr3R	4599731	4599931
chr3R	4609517	4609717
chr3R	4612685	4612885
chr3R	4738952	4739152
chr3R	4739581	4739781
chr3R	4740266	4740466
chr3R	4740659	4740859
chr3R	4746418	4746618
chr3R	4749759	4749959
chr3R	4797704	4797904
chr3R	4798071	4798271
chr3R	4802195	4802395
chr3R	4802452	4802652
chr3R	4803262	4803462
chr3R	4806447	4806647
chr3R	4807706	4807906
chr3R	4810070	4810270
chr3R	4910977	4911177
chr3R	5087146	5087346
chr3R	5087862	5088062
chr3R	5216339	5216539
chr3R	5264799	5264999
chr3R	5282918	5283118
chr3R	5413682	5413882
chr3R	5414238	5414438
chr3R	5518728	5518928
chr3R	5600418	5600618
chr3R	5612471	5612671
chr3R	5671282	5671482
chr3R	5672550	5672750
chr3R	5701128	5701328
chr3R	5716818	5717018
chr3R	6003059	6003259
chr3R	6007811	6008011
chr3R	6157224	6157424
chr3R	6351338	6351538
chr3R	6368380	6368580
chr3R	6402948	6403148
chr3R	6405340	6405540
chr3R	6407602	6407802
chr3R	6410773	6410973
chr3R	6424215	6424415
chr3R	6474526	6474726
chr3R	6791667	6791867
chr3R	6810750	6810950
chr3R	6816421	6816621
chr3R	6848765	6848965
chr3R	6893432	6893632
chr3R	6966789	6966989
chr3R	6996908	6997108
chr3R	6999399	6999599
chr3R	7000735	7000935
chr3R	7037360	7037560
chr3R	7103453	7103653
chr3R	7107856	7108056
chr3R	7108382	7108582
chr3R	7109044	7109244
chr3R	7109730	7109930
chr3R	7162664	7162864
chr3R	7187190	7187390
chr3R	7188073	7188273
chr3R	7306812	7307012
chr3R	7309781	7309981
chr3R	7310686	7310886
chr3R	7313198	7313398
chr3R	7491567	7491767
chr3R	7750043	7750243
chr3R	7793892	7794092
chr3R	7884215	7884415
chr3R	7962896	7963096
chr3R	7967965	7968165
chr3R	8027098	8027298
chr3R	8027544	8027744
chr3R	8093984	8094184
chr3R	8106121	8106321
chr3R	8119932	8120132
chr3R	8170309	8170509
chr3R	8181540	8181740
chr3R	8187809	8188009
chr3R	8190899	8191099
chr3R	8333879	8334079
chr3R	8334402	8334602
chr3R	8334960	8335160
chr3R	8413980	8414180
chr3R	8658806	8659006
chr3R	8669185	8669385
chr3R	8680741	8680941
chr3R	8697923	8698123
chr3R	8792565	8792765
chr3R	8927966	8928166
chr3R	8928352	8928552
chr3R	8955605	8955805
chr3R	8962974	8963174
chr3R	8980671	8980871
chr3R	9033721	9033921
chr3R	9034061	9034261
chr3R	9053032	9053232
chr3R	9054590	9054790
chr3R	9056500	9056700
chr3R	9057179	9057379
chr3R	9057638	9057838
chr3R	9158120	9158320
chr3R	9220431	9220631
chr3R	9226857	9227057
chr3R	9229562	9229762
chr3R	9230114	9230314
chr3R	9236277	9236477
chr3R	9236994	9237194
chr3R	9239892	9240092
chr3R	9247153	9247353
chr3R	9340948	9341148
chr3R	9342501	9342701
chr3R	9353105	9353305
chr3R	9359471	9359671
chr3R	9394539	9394739
chr3R	9417702	9417902
chr3R	9418327	9418527
chr3R	9418742	9418942
chr3R	9419298	9419498
chr3R	9428305	9428505
chr3R	9436666	9436866
chr3R	9502542	9502742
chr3R	9512317	9512517
chr3R	9512777	9512977
chr3R	9532985	9533185
chr3R	9533530	9533730
chr3R	9534692	9534892
chr3R	9543631	9543831
chr3R	9550768	9550968
chr3R	9551318	9551518
chr3R	9573565	9573765
chr3R	9704822	9705022
chr3R	9784409	9784609
chr3R	9866066	9866266
chr3R	9868251	9868451
chr3R	9872393	9872593
chr3R	9873607	9873807
chr3R	9874013	9874213
chr3R	9874498	9874698
chr3R	9928676	9928876
chr3R	9979119	9979319
chr3R	9979441	9979641
chr3R	10035276	10035476
chr3R	10048709	10048909
chr3R	10079388	10079588
chr3R	10087170	10087370
chr3R	10089315	10089515
chr3R	10093586	10093786
chr3R	10109275	10109475
chr3R	10112075	10112275
[truncated: 1,392 more rows]

## Sheet: Stage 5 (GAF-sfGFP(C))
chromosome	start	end
chr2L	5768	5968
chr2L	6663	6863
chr2L	66838	67038
chr2L	67168	67368
chr2L	107936	108136
chr2L	166900	167100
chr2L	220563	220763
chr2L	221260	221460
chr2L	222051	222251
chr2L	223306	223506
chr2L	224124	224324
chr2L	246632	246832
chr2L	249206	249406
chr2L	249877	250077
chr2L	250479	250679
chr2L	368788	368988
chr2L	377744	377944
chr2L	428182	428382
chr2L	431030	431230
chr2L	431680	431880
chr2L	455466	455666
chr2L	472244	472444
chr2L	479021	479221
chr2L	486967	487167
chr2L	487802	488002
chr2L	488111	488311
chr2L	490647	490847
chr2L	491936	492136
chr2L	510598	510798
chr2L	516599	516799
chr2L	518135	518335
chr2L	519194	519394
chr2L	521691	521891
chr2L	522350	522550
chr2L	523464	523664
chr2L	590110	590310
chr2L	594763	594963
chr2L	597040	597240
chr2L	597855	598055
chr2L	685378	685578
chr2L	701882	702082
chr2L	715210	715410
chr2L	718687	718887
chr2L	826483	826683
chr2L	867238	867438
chr2L	868328	868528
chr2L	935608	935808
chr2L	1119006	1119206
chr2L	1421698	1421898
chr2L	1617917	1618117
chr2L	1648813	1649013
chr2L	1649960	1650160
chr2L	1651090	1651290
chr2L	1658248	1658448
chr2L	1662577	1662777
chr2L	1663168	1663368
chr2L	1737305	1737505
chr2L	1886410	1886610
chr2L	1954609	1954809
chr2L	1970532	1970732
chr2L	1971487	1971687
chr2L	1972775	1972975
chr2L	2013920	2014120
chr2L	2130335	2130535
chr2L	2161513	2161713
chr2L	2162930	2163130
chr2L	2163732	2163932
chr2L	2164770	2164970
chr2L	2173580	2173780
chr2L	2175542	2175742
chr2L	2178701	2178901
chr2L	2197080	2197280
chr2L	2200374	2200574
chr2L	2202410	2202610
chr2L	2221910	2222110
chr2L	2227289	2227489
chr2L	2242172	2242372
chr2L	2362934	2363134
chr2L	2363533	2363733
chr2L	2365420	2365620
chr2L	2450964	2451164
chr2L	2454496	2454696
chr2L	2493366	2493566
chr2L	2576639	2576839
chr2L	2701006	2701206
chr2L	2750948	2751148
chr2L	2753066	2753266
chr2L	2753715	2753915
chr2L	2754391	2754591
chr2L	2755343	2755543
chr2L	2798926	2799126
chr2L	2862363	2862563
chr2L	2874771	2874971
chr2L	2886058	2886258
chr2L	2886665	2886865
chr2L	2888104	2888304
chr2L	2888857	2889057
chr2L	2889279	2889479
chr2L	2908915	2909115
chr2L	2909531	2909731
chr2L	2955917	2956117
chr2L	2957913	2958113
chr2L	2999855	3000055
chr2L	3095146	3095346
chr2L	3302138	3302338
chr2L	3303123	3303323
chr2L	3335175	3335375
chr2L	3354818	3355018
chr2L	3426051	3426251
chr2L	3426881	3427081
chr2L	3476563	3476763
chr2L	3478279	3478479
chr2L	3538973	3539173
chr2L	3539483	3539683
chr2L	3540061	3540261
chr2L	3580849	3581049
chr2L	3594236	3594436
chr2L	3606480	3606680
chr2L	3632130	3632330
chr2L	3632930	3633130
chr2L	3655827	3656027
chr2L	3656392	3656592
chr2L	3656879	3657079
chr2L	3657512	3657712
chr2L	3658049	3658249
chr2L	3662383	3662583
chr2L	3771557	3771757
chr2L	3789681	3789881
chr2L	3803769	3803969
chr2L	3806244	3806444
chr2L	3825516	3825716
chr2L	3836588	3836788
chr2L	3888830	3889030
chr2L	3896069	3896269
chr2L	3991835	3992035
chr2L	3992465	3992665
chr2L	4028277	4028477
chr2L	4028836	4029036
chr2L	4031234	4031434
chr2L	4094271	4094471
chr2L	4197343	4197543
chr2L	4221746	4221946
chr2L	4222464	4222664
chr2L	4281889	4282089
chr2L	4283000	4283200
chr2L	4286995	4287195
chr2L	4301494	4301694
chr2L	4333761	4333961
chr2L	4370625	4370825
chr2L	4371805	4372005
chr2L	4375213	4375413
chr2L	4592010	4592210
chr2L	4595055	4595255
chr2L	4614471	4614671
chr2L	4620710	4620910
chr2L	4820726	4820926
chr2L	4821159	4821359
chr2L	4852683	4852883
chr2L	4880479	4880679
chr2L	4906710	4906910
chr2L	4997685	4997885
chr2L	4998933	4999133
chr2L	5000268	5000468
chr2L	5000764	5000964
chr2L	5001355	5001555
chr2L	5004776	5004976
chr2L	5024748	5024948
chr2L	5030546	5030746
chr2L	5073578	5073778
chr2L	5079415	5079615
chr2L	5093036	5093236
chr2L	5107759	5107959
chr2L	5108283	5108483
chr2L	5237364	5237564
chr2L	5297022	5297222
chr2L	5306552	5306752
chr2L	5333468	5333668
chr2L	5403664	5403864
chr2L	5421748	5421948
chr2L	5461320	5461520
chr2L	5542953	5543153
chr2L	5547090	5547290
chr2L	5658609	5658809
chr2L	5659238	5659438
chr2L	5696892	5697092
chr2L	5724382	5724582
chr2L	5789533	5789733
chr2L	5799697	5799897
chr2L	5800095	5800295
chr2L	5805260	5805460
chr2L	5879463	5879663
chr2L	5907300	5907500
chr2L	5925372	5925572
chr2L	5943778	5943978
chr2L	5944555	5944755
chr2L	5977584	5977784
chr2L	5978358	5978558
chr2L	5980137	5980337
chr2L	5981964	5982164
chr2L	5982467	5982667
chr2L	5983330	5983530
chr2L	5997299	5997499
chr2L	5997942	5998142
chr2L	6054110	6054310
chr2L	6079113	6079313
chr2L	6088470	6088670
chr2L	6109109	6109309
chr2L	6115109	6115309
chr2L	6178698	6178898
chr2L	6178932	6179132
chr2L	6186552	6186752
chr2L	6252417	6252617
chr2L	6252812	6253012
chr2L	6324375	6324575
chr2L	6339291	6339491
chr2L	6479378	6479578
chr2L	6503079	6503279
chr2L	6536197	6536397
chr2L	6545243	6545443
chr2L	6599446	6599646
chr2L	6601068	6601268
chr2L	6647346	6647546
chr2L	6648439	6648639
chr2L	6667835	6668035
chr2L	6786812	6787012
chr2L	6792080	6792280
chr2L	6793742	6793942
chr2L	6794145	6794345
chr2L	6794572	6794772
chr2L	6833639	6833839
chr2L	6927061	6927261
chr2L	6939810	6940010
chr2L	7003779	7003979
chr2L	7009936	7010136
chr2L	7049110	7049310
chr2L	7050053	7050253
chr2L	7110839	7111039
chr2L	7122061	7122261
chr2L	7188669	7188869
chr2L	7199827	7200027
chr2L	7219423	7219623
chr2L	7243695	7243895
chr2L	7245402	7245602
chr2L	7249466	7249666
chr2L	7418587	7418787
chr2L	7419762	7419962
chr2L	7420674	7420874
chr2L	7422517	7422717
chr2L	7424946	7425146
chr2L	7495505	7495705
chr2L	7530404	7530604
chr2L	7530884	7531084
chr2L	7611439	7611639
chr2L	7701577	7701777
chr2L	7791415	7791615
chr2L	7811356	7811556
chr2L	7828227	7828427
chr2L	7828906	7829106
chr2L	7832811	7833011
chr2L	7855280	7855480
chr2L	7887415	7887615
chr2L	7966779	7966979
chr2L	7976806	7977006
chr2L	7984211	7984411
chr2L	7985111	7985311
chr2L	7991676	7991876
chr2L	7993713	7993913
chr2L	7994417	7994617
chr2L	8010679	8010879
chr2L	8030962	8031162
chr2L	8031712	8031912
chr2L	8083688	8083888
chr2L	8084695	8084895
chr2L	8088439	8088639
chr2L	8100273	8100473
chr2L	8104129	8104329
chr2L	8162920	8163120
chr2L	8214118	8214318
chr2L	8277654	8277854
chr2L	8278352	8278552
chr2L	8300732	8300932
chr2L	8328857	8329057
chr2L	8415751	8415951
chr2L	8416421	8416621
chr2L	8420265	8420465
chr2L	8424907	8425107
chr2L	8478542	8478742
chr2L	8521997	8522197
chr2L	8535063	8535263
chr2L	8542335	8542535
chr2L	8542713	8542913
chr2L	8543215	8543415
chr2L	8544000	8544200
chr2L	8587942	8588142
chr2L	8675651	8675851
chr2L	8709009	8709209
chr2L	8718054	8718254
chr2L	8735751	8735951
chr2L	8739980	8740180
chr2L	8825493	8825693
chr2L	8898567	8898767
chr2L	8949924	8950124
chr2L	8951159	8951359
chr2L	8951486	8951686
chr2L	8958219	8958419
chr2L	8984888	8985088
chr2L	9176214	9176414
chr2L	9176770	9176970
chr2L	9178595	9178795
chr2L	9179423	9179623
chr2L	9203587	9203787
chr2L	9205212	9205412
chr2L	9229887	9230087
chr2L	9416332	9416532
chr2L	9448351	9448551
chr2L	9449225	9449425
chr2L	9449714	9449914
chr2L	9493949	9494149
chr2L	9497292	9497492
chr2L	9521226	9521426
chr2L	9521622	9521822
chr2L	9522438	9522638
chr2L	9522953	9523153
chr2L	9566293	9566493
chr2L	9567626	9567826
chr2L	9568429	9568629
chr2L	9568724	9568924
chr2L	9581680	9581880
chr2L	9608103	9608303
chr2L	9613270	9613470
chr2L	9616779	9616979
chr2L	9697917	9698117
chr2L	9698484	9698684
chr2L	9705281	9705481
chr2L	9705931	9706131
chr2L	9723536	9723736
chr2L	9744735	9744935
chr2L	9746676	9746876
chr2L	9758123	9758323
chr2L	9782187	9782387
chr2L	9861392	9861592
chr2L	9863622	9863822
chr2L	9874631	9874831
chr2L	9879644	9879844
chr2L	9929196	9929396
chr2L	10009919	10010119
chr2L	10208985	10209185
chr2L	10353928	10354128
chr2L	10457549	10457749
chr2L	10967345	10967545
chr2L	11045188	11045388
chr2L	11065692	11065892
chr2L	11067028	11067228
chr2L	11086546	11086746
chr2L	11155704	11155904
chr2L	11167268	11167468
chr2L	11168797	11168997
chr2L	11206859	11207059
chr2L	11358583	11358783
chr2L	11445771	11445971
chr2L	11447754	11447954
chr2L	11452539	11452739
chr2L	11581168	11581368
chr2L	11581744	11581944
chr2L	11804826	11805026
chr2L	11806885	11807085
chr2L	11807024	11807224
chr2L	11808011	11808211
chr2L	11808763	11808963
chr2L	11949032	11949232
chr2L	11968962	11969162
chr2L	11970414	11970614
chr2L	11971145	11971345
chr2L	11977749	11977949
chr2L	11987069	11987269
chr2L	12044702	12044902
chr2L	12055946	12056146
chr2L	12065939	12066139
chr2L	12114117	12114317
chr2L	12288613	12288813
chr2L	12296826	12297026
chr2L	12364400	12364600
chr2L	12366142	12366342
chr2L	12421839	12422039
chr2L	12459946	12460146
chr2L	12461239	12461439
chr2L	12483049	12483249
chr2L	12484259	12484459
chr2L	12504230	12504430
chr2L	12504902	12505102
chr2L	12507670	12507870
chr2L	12521127	12521327
chr2L	12529752	12529952
chr2L	12543239	12543439
chr2L	12543982	12544182
chr2L	12545820	12546020
chr2L	12587214	12587414
chr2L	12618157	12618357
chr2L	12618545	12618745
chr2L	12655791	12655991
chr2L	12678381	12678581
chr2L	12822791	12822991
chr2L	12854584	12854784
chr2L	12974975	12975175
chr2L	12987309	12987509
chr2L	12997887	12998087
chr2L	13032673	13032873
chr2L	13035937	13036137
chr2L	13165788	13165988
chr2L	13322042	13322242
chr2L	13331933	13332133
chr2L	13354583	13354783
chr2L	13415088	13415288
chr2L	13489582	13489782
chr2L	13511505	13511705
chr2L	13512767	13512967
chr2L	13513402	13513602
chr2L	13514211	13514411
chr2L	13548783	13548983
chr2L	13550483	13550683
chr2L	13550661	13550861
chr2L	13666058	13666258
chr2L	13878072	13878272
chr2L	13878863	13879063
chr2L	13977149	13977349
chr2L	14040289	14040489
chr2L	14040960	14041160
chr2L	14049806	14050006
chr2L	14051590	14051790
chr2L	14054362	14054562
chr2L	14116234	14116434
chr2L	14118329	14118529
chr2L	14180755	14180955
chr2L	14233391	14233591
chr2L	14233994	14234194
chr2L	14234544	14234744
chr2L	14385286	14385486
chr2L	14409638	14409838
chr2L	14470142	14470342
chr2L	14490595	14490795
chr2L	14508950	14509150
chr2L	14689527	14689727
chr2L	14939855	14940055
chr2L	15013595	15013795
chr2L	15017351	15017551
chr2L	15039624	15039824
chr2L	15057049	15057249
chr2L	15109199	15109399
chr2L	15126884	15127084
chr2L	15264634	15264834
chr2L	15332689	15332889
chr2L	15333592	15333792
chr2L	15467161	15467361
chr2L	15478344	15478544
chr2L	15492055	15492255
chr2L	15499510	15499710
chr2L	15552522	15552722
chr2L	15745636	15745836
chr2L	15746195	15746395
chr2L	15747548	15747748
chr2L	15748064	15748264
chr2L	15762547	15762747
chr2L	15911817	15912017
chr2L	16000246	16000446
chr2L	16049755	16049955
chr2L	16231313	16231513
chr2L	16234148	16234348
chr2L	16234882	16235082
chr2L	16251756	16251956
chr2L	16268064	16268264
chr2L	16269411	16269611
chr2L	16276842	16277042
chr2L	16279983	16280183
chr2L	16284851	16285051
chr2L	16286132	16286332
chr2L	16286678	16286878
chr2L	16287350	16287550
chr2L	16299564	16299764
chr2L	16325853	16326053
chr2L	16371496	16371696
chr2L	16422738	16422938
chr2L	16423059	16423259
chr2L	16486295	16486495
chr2L	16496575	16496775
chr2L	16520215	16520415
chr2L	16521441	16521641
chr2L	16526332	16526532
chr2L	16532978	16533178
chr2L	16534200	16534400
chr2L	16534995	16535195
chr2L	16535716	16535916
chr2L	16543988	16544188
chr2L	16545723	16545923
chr2L	16548211	16548411
chr2L	16548797	16548997
chr2L	16587990	16588190
chr2L	16597650	16597850
chr2L	16601467	16601667
chr2L	16619279	16619479
chr2L	16685222	16685422
chr2L	16689818	16690018
chr2L	16690481	16690681
chr2L	16716097	16716297
chr2L	16716434	16716634
chr2L	16718721	16718921
chr2L	16817459	16817659
chr2L	16857874	16858074
chr2L	16972763	16972963
chr2L	17102487	17102687
chr2L	17323628	17323828
chr2L	17341231	17341431
chr2L	17382807	17383007
chr2L	17429851	17430051
chr2L	17449697	17449897
chr2L	17565866	17566066
chr2L	17589237	17589437
chr2L	17621290	17621490
chr2L	17735691	17735891
chr2L	17751152	17751352
chr2L	17752574	17752774
chr2L	17754249	17754449
chr2L	18444742	18444942
chr2L	18455507	18455707
chr2L	18456012	18456212
chr2L	18483894	18484094
chr2L	18484486	18484686
chr2L	18629219	18629419
chr2L	18753538	18753738
chr2L	18777609	18777809
chr2L	18782923	18783123
chr2L	18794372	18794572
chr2L	18845018	18845218
chr2L	18846056	18846256
chr2L	18846983	18847183
chr2L	18881243	18881443
chr2L	18884714	18884914
chr2L	18917901	18918101
chr2L	19134939	19135139
chr2L	19135323	19135523
chr2L	19136473	19136673
chr2L	19136934	19137134
chr2L	19154862	19155062
chr2L	19158277	19158477
chr2L	19161575	19161775
chr2L	19165221	19165421
chr2L	19362892	19363092
chr2L	19398034	19398234
chr2L	19398987	19399187
chr2L	19414012	19414212
chr2L	19414423	19414623
chr2L	19423501	19423701
chr2L	19426536	19426736
chr2L	19474020	19474220
chr2L	19479751	19479951
chr2L	19548314	19548514
chr2L	19571889	19572089
chr2L	19572582	19572782
chr2L	19575480	19575680
chr2L	19576044	19576244
chr2L	19576517	19576717
chr2L	19606318	19606518
chr2L	19702181	19702381
chr2L	19819937	19820137
chr2L	19820711	19820911
chr2L	19917940	19918140
chr2L	19935123	19935323
chr2L	19985783	19985983
chr2L	20118132	20118332
chr2L	20204860	20205060
chr2L	20311048	20311248
chr2L	20494492	20494692
chr2L	20561492	20561692
chr2L	20561994	20562194
chr2L	20638396	20638596
chr2L	20714633	20714833
chr2L	20774301	20774501
chr2L	20793861	20794061
chr2L	20800525	20800725
chr2L	20808432	20808632
chr2L	20890351	20890551
chr2L	20916836	20917036
chr2L	20945015	20945215
chr2L	21052052	21052252
chr2L	21096766	21096966
chr2L	21105168	21105368
chr2L	21141806	21142006
chr2L	21151263	21151463
chr2L	21178634	21178834
chr2L	21221881	21222081
chr2L	21237754	21237954
chr2L	21251948	21252148
chr2L	21309456	21309656
chr2L	21313223	21313423
chr2L	21570710	21570910
chr2L	21571678	21571878
chr2L	21572931	21573131
chr2L	21618041	21618241
chr2L	21618738	21618938
chr2L	21629817	21630017
chr2L	21633014	21633214
chr2L	21633187	21633387
chr2L	21725752	21725952
chr2L	21745875	21746075
chr2L	21753713	21753913
chr2L	21794681	21794881
chr2L	21795355	21795555
chr2L	21828432	21828632
chr2L	21851526	21851726
chr2L	21871563	21871763
chr2L	21899385	21899585
chr2L	22019029	22019229
chr2L	22024372	22024572
chr2L	22078559	22078759
chr2L	22134190	22134390
chr2L	22144108	22144308
chr2L	22220745	22220945
chr2L	22251166	22251366
chr2L	22255438	22255638
chr2L	22339424	22339624
chr2L	22339790	22339990
chr2L	22361204	22361404
chr2L	22551767	22551967
chr2L	22631855	22632055
chr2L	22714476	22714676
chr2L	22717409	22717609
chr2L	22756339	22756539
chr2L	22929559	22929759
chr2L	23068804	23069004
chr2L	23512735	23512935
chr2R	901855	902055
chr2R	947043	947243
chr2R	949376	949576
chr2R	1089212	1089412
chr2R	1369457	1369657
chr2R	1372989	1373189
chr2R	1412140	1412340
chr2R	1511047	1511247
chr2R	1512846	1513046
chr2R	1763406	1763606
chr2R	1994655	1994855
chr2R	2309430	2309630
chr2R	2832267	2832467
chr2R	2843012	2843212
chr2R	2904444	2904644
chr2R	2932771	2932971
chr2R	2981270	2981470
chr2R	3032038	3032238
chr2R	3292652	3292852
chr2R	3492728	3492928
chr2R	3502181	3502381
chr2R	3934531	3934731
chr2R	4186356	4186556
chr2R	4193329	4193529
chr2R	4593090	4593290
chr2R	4606182	4606382
chr2R	4639786	4639986
chr2R	4707976	4708176
chr2R	4709145	4709345
chr2R	4750293	4750493
chr2R	4820773	4820973
chr2R	4830239	4830439
chr2R	5041493	5041693
chr2R	5089484	5089684
chr2R	5126567	5126767
chr2R	5141537	5141737
chr2R	5262497	5262697
chr2R	5426358	5426558
chr2R	5710180	5710380
chr2R	5726919	5727119
chr2R	5773099	5773299
chr2R	5782241	5782441
chr2R	5992712	5992912
chr2R	6102476	6102676
chr2R	6119294	6119494
chr2R	6120491	6120691
chr2R	6132002	6132202
chr2R	6133087	6133287
chr2R	6156357	6156557
chr2R	6157031	6157231
chr2R	6168323	6168523
chr2R	6193805	6194005
chr2R	6196251	6196451
chr2R	6220337	6220537
chr2R	6220877	6221077
chr2R	6236042	6236242
chr2R	6527873	6528073
chr2R	6575104	6575304
chr2R	6605979	6606179
chr2R	6610272	6610472
chr2R	6613112	6613312
chr2R	6628283	6628483
chr2R	6630450	6630650
chr2R	6631519	6631719
chr2R	6632392	6632592
chr2R	6828172	6828372
chr2R	6871774	6871974
chr2R	6872583	6872783
chr2R	6885731	6885931
chr2R	6992730	6992930
chr2R	7025180	7025380
chr2R	7106442	7106642
chr2R	7146933	7147133
chr2R	7170947	7171147
chr2R	7352483	7352683
chr2R	7381845	7382045
chr2R	7418610	7418810
chr2R	7419189	7419389
chr2R	7457471	7457671
chr2R	7458829	7459029
chr2R	7488750	7488950
chr2R	7489756	7489956
chr2R	7490453	7490653
chr2R	7492329	7492529
chr2R	7529275	7529475
chr2R	7530903	7531103
chr2R	7544299	7544499
chr2R	7544986	7545186
chr2R	7546744	7546944
chr2R	7597756	7597956
chr2R	7623035	7623235
chr2R	7665671	7665871
chr2R	7692792	7692992
chr2R	7699401	7699601
chr2R	7745380	7745580
chr2R	7755676	7755876
chr2R	7779843	7780043
chr2R	7885980	7886180
chr2R	7959639	7959839
chr2R	7989074	7989274
chr2R	8018836	8019036
chr2R	8061074	8061274
chr2R	8062474	8062674
chr2R	8064979	8065179
chr2R	8065430	8065630
chr2R	8069260	8069460
chr2R	8083322	8083522
chr2R	8145935	8146135
chr2R	8174499	8174699
chr2R	8232334	8232534
chr2R	8237124	8237324
chr2R	8237689	8237889
chr2R	8241979	8242179
chr2R	8272793	8272993
chr2R	8301731	8301931
chr2R	8313699	8313899
chr2R	8322572	8322772
chr2R	8327163	8327363
chr2R	8375747	8375947
chr2R	8407868	8408068
chr2R	8444209	8444409
chr2R	8462359	8462559
chr2R	8632455	8632655
chr2R	8647888	8648088
chr2R	8649418	8649618
chr2R	8650017	8650217
chr2R	8655785	8655985
chr2R	8665983	8666183
chr2R	8666786	8666986
chr2R	8667608	8667808
chr2R	8668780	8668980
chr2R	8670457	8670657
chr2R	8724399	8724599
chr2R	8798284	8798484
chr2R	8801702	8801902
chr2R	8829136	8829336
chr2R	8862534	8862734
chr2R	8985591	8985791
chr2R	9056328	9056528
chr2R	9059916	9060116
chr2R	9231318	9231518
chr2R	9275486	9275686
chr2R	9278915	9279115
chr2R	9284172	9284372
chr2R	9284753	9284953
chr2R	9292581	9292781
chr2R	9294034	9294234
chr2R	9376716	9376916
chr2R	9389939	9390139
chr2R	9408887	9409087
chr2R	9413428	9413628
chr2R	9414151	9414351
chr2R	9426422	9426622
chr2R	9426929	9427129
chr2R	9441016	9441216
chr2R	9441491	9441691
chr2R	9443079	9443279
chr2R	9519107	9519307
chr2R	9519609	9519809
chr2R	9520769	9520969
chr2R	9521377	9521577
chr2R	9540482	9540682
chr2R	9546861	9547061
chr2R	9548170	9548370
chr2R	9552880	9553080
chr2R	9553900	9554100
chr2R	9566792	9566992
chr2R	9567214	9567414
chr2R	9683827	9684027
chr2R	9711606	9711806
chr2R	9712158	9712358
chr2R	9820086	9820286
chr2R	9875151	9875351
chr2R	9929713	9929913
chr2R	9949533	9949733
chr2R	9955167	9955367
chr2R	9979079	9979279
chr2R	10026007	10026207
chr2R	10048022	10048222
chr2R	10056678	10056878
chr2R	10057758	10057958
chr2R	10078223	10078423
chr2R	10100833	10101033
chr2R	10101591	10101791
chr2R	10124111	10124311
chr2R	10124769	10124969
chr2R	10134682	10134882
chr2R	10211417	10211617
chr2R	10214126	10214326
chr2R	10219649	10219849
chr2R	10225067	10225267
chr2R	10228086	10228286
chr2R	10238333	10238533
chr2R	10239177	10239377
chr2R	10418182	10418382
chr2R	10421297	10421497
chr2R	10421896	10422096
chr2R	10423236	10423436
chr2R	10424003	10424203
chr2R	10428973	10429173
chr2R	10430407	10430607
chr2R	10432418	10432618
chr2R	10437951	10438151
chr2R	10477849	10478049
chr2R	10478454	10478654
chr2R	10485444	10485644
chr2R	10486726	10486926
chr2R	10515598	10515798
chr2R	10522941	10523141
chr2R	10534206	10534406
chr2R	10535067	10535267
chr2R	10536118	10536318
chr2R	10540520	10540720
chr2R	10541638	10541838
chr2R	10542342	10542542
chr2R	10542858	10543058
chr2R	10551901	10552101
chr2R	10552955	10553155
chr2R	10554059	10554259
chr2R	10555257	10555457
chr2R	10558672	10558872
chr2R	10559725	10559925
chr2R	10566555	10566755
chr2R	10567088	10567288
chr2R	10568998	10569198
chr2R	10569444	10569644
chr2R	10596307	10596507
chr2R	10618473	10618673
chr2R	10675073	10675273
chr2R	10682583	10682783
chr2R	10717946	10718146
chr2R	10781984	10782184
chr2R	10782768	10782968
chr2R	10798709	10798909
chr2R	10805141	10805341
chr2R	10806542	10806742
chr2R	10807333	10807533
chr2R	10861443	10861643
chr2R	11001487	11001687
chr2R	11072878	11073078
chr2R	11107532	11107732
chr2R	11116384	11116584
chr2R	11145082	11145282
chr2R	11175255	11175455
chr2R	11184168	11184368
chr2R	11185313	11185513
chr2R	11197226	11197426
chr2R	11198933	11199133
chr2R	11202269	11202469
chr2R	11203266	11203466
chr2R	11231948	11232148
chr2R	11232400	11232600
chr2R	11232861	11233061
chr2R	11283831	11284031
chr2R	11365861	11366061
chr2R	11366720	11366920
chr2R	11367390	11367590
chr2R	11397380	11397580
chr2R	11450718	11450918
chr2R	11469502	11469702
chr2R	11475556	11475756
chr2R	11493948	11494148
chr2R	11527973	11528173
chr2R	11529568	11529768
chr2R	11592394	11592594
chr2R	11593088	11593288
chr2R	11593973	11594173
chr2R	11597816	11598016
chr2R	11603492	11603692
chr2R	11604460	11604660
chr2R	11605031	11605231
chr2R	11615985	11616185
chr2R	11626526	11626726
chr2R	11633505	11633705
chr2R	11635215	11635415
chr2R	11637300	11637500
chr2R	11639540	11639740
chr2R	11640504	11640704
chr2R	11648506	11648706
chr2R	11650915	11651115
chr2R	11657985	11658185
chr2R	11662869	11663069
chr2R	11665489	11665689
chr2R	11666670	11666870
chr2R	11756460	11756660
chr2R	11757699	11757899
chr2R	11892869	11893069
chr2R	11997402	11997602
chr2R	12019788	12019988
chr2R	12025198	12025398
chr2R	12054814	12055014
chr2R	12099255	12099455
chr2R	12101178	12101378
chr2R	12102404	12102604
chr2R	12111233	12111433
chr2R	12119069	12119269
chr2R	12212580	12212780
chr2R	12249576	12249776
chr2R	12252889	12253089
chr2R	12259238	12259438
chr2R	12261355	12261555
chr2R	12271610	12271810
chr2R	12437605	12437805
chr2R	12451385	12451585
chr2R	12453190	12453390
chr2R	12454073	12454273
chr2R	12587052	12587252
chr2R	12588277	12588477
chr2R	12589118	12589318
chr2R	12589546	12589746
chr2R	12591699	12591899
chr2R	12592334	12592534
chr2R	12686732	12686932
chr2R	12687260	12687460
chr2R	12704981	12705181
chr2R	12743175	12743375
chr2R	12776777	12776977
chr2R	12780291	12780491
chr2R	12884560	12884760
chr2R	12886809	12887009
chr2R	12904442	12904642
chr2R	12905171	12905371
chr2R	12947768	12947968
chr2R	12955938	12956138
chr2R	12958642	12958842
chr2R	12980755	12980955
chr2R	12984602	12984802
chr2R	12985735	12985935
chr2R	12991810	12992010
chr2R	12996315	12996515
chr2R	12997111	12997311
chr2R	13015672	13015872
chr2R	13035343	13035543
chr2R	13038805	13039005
chr2R	13041620	13041820
chr2R	13042058	13042258
chr2R	13189290	13189490
chr2R	13190063	13190263
chr2R	13191517	13191717
chr2R	13192890	13193090
chr2R	13219231	13219431
chr2R	13223666	13223866
chr2R	13337342	13337542
chr2R	13424942	13425142
chr2R	13449321	13449521
chr2R	13502038	13502238
chr2R	13539733	13539933
chr2R	13565983	13566183
chr2R	13592975	13593175
chr2R	13620232	13620432
chr2R	13621348	13621548
chr2R	13622816	13623016
chr2R	13629689	13629889
chr2R	13812775	13812975
chr2R	13822781	13822981
chr2R	13824179	13824379
chr2R	13826231	13826431
chr2R	13826584	13826784
chr2R	13829232	13829432
chr2R	13839844	13840044
chr2R	13897685	13897885
chr2R	13924133	13924333
chr2R	13925500	13925700
chr2R	13926043	13926243
chr2R	13926799	13926999
chr2R	13934741	13934941
chr2R	13939768	13939968
chr2R	13941137	13941337
chr2R	13946882	13947082
chr2R	13957532	13957732
chr2R	13958070	13958270
chr2R	13990425	13990625
chr2R	13991128	13991328
chr2R	13991760	13991960
chr2R	13992449	13992649
chr2R	14000918	14001118
chr2R	14006754	14006954
chr2R	14008318	14008518
chr2R	14026916	14027116
chr2R	14031284	14031484
chr2R	14041137	14041337
chr2R	14139902	14140102
chr2R	14140861	14141061
chr2R	14275334	14275534
chr2R	14307328	14307528
chr2R	14307997	14308197
chr2R	14332203	14332403
chr2R	14432184	14432384
chr2R	14435673	14435873
chr2R	14449037	14449237
chr2R	14458305	14458505
chr2R	14481444	14481644
chr2R	14481845	14482045
chr2R	14526463	14526663
chr2R	14526934	14527134
chr2R	14649574	14649774
chr2R	14713597	14713797
chr2R	14715837	14716037
chr2R	14755738	14755938
chr2R	14765582	14765782
chr2R	14768675	14768875
chr2R	14799062	14799262
chr2R	14799557	14799757
chr2R	14814335	14814535
chr2R	14908246	14908446
chr2R	14928162	14928362
chr2R	14933276	14933476
chr2R	14933867	14934067
chr2R	14954487	14954687
chr2R	14958420	14958620
chr2R	14959027	14959227
chr2R	14962467	14962667
chr2R	14964547	14964747
chr2R	14970156	14970356
chr2R	14981762	14981962
chr2R	14982424	14982624
chr2R	15010694	15010894
chr2R	15116320	15116520
chr2R	15128286	15128486
chr2R	15130892	15131092
chr2R	15155237	15155437
chr2R	15252487	15252687
chr2R	15308426	15308626
chr2R	15309268	15309468
chr2R	15329313	15329513
chr2R	15330898	15331098
chr2R	15349564	15349764
chr2R	15374548	15374748
chr2R	15425000	15425200
chr2R	15497199	15497399
chr2R	15600403	15600603
chr2R	15610018	15610218
chr2R	15610919	15611119
chr2R	15613216	15613416
chr2R	15613666	15613866
chr2R	15648762	15648962
chr2R	15654842	15655042
chr2R	15675350	15675550
chr2R	15676002	15676202
chr2R	15735259	15735459
chr2R	15809062	15809262
chr2R	15813757	15813957
chr2R	15816997	15817197
chr2R	15890884	15891084
chr2R	15931362	15931562
chr2R	15931772	15931972
chr2R	15990085	15990285
chr2R	16031228	16031428
chr2R	16031743	16031943
chr2R	16103147	16103347
chr2R	16104407	16104607
chr2R	16111025	16111225
chr2R	16125213	16125413
chr2R	16129077	16129277
chr2R	16130207	16130407
chr2R	16161950	16162150
chr2R	16180049	16180249
chr2R	16187678	16187878
chr2R	16206525	16206725
chr2R	16210398	16210598
chr2R	16221181	16221381
chr2R	16257093	16257293
chr2R	16270455	16270655
chr2R	16335880	16336080
chr2R	16336547	16336747
chr2R	16338944	16339144
chr2R	16366508	16366708
chr2R	16377007	16377207
chr2R	16386330	16386530
chr2R	16386788	16386988
chr2R	16499899	16500099
chr2R	16514907	16515107
chr2R	16579397	16579597
chr2R	16579866	16580066
chr2R	16580610	16580810
chr2R	16583460	16583660
chr2R	16583826	16584026
chr2R	16585623	16585823
chr2R	16594193	16594393
chr2R	16594708	16594908
chr2R	16607872	16608072
chr2R	16611999	16612199
chr2R	16667926	16668126
chr2R	16764413	16764613
chr2R	16856463	16856663
chr2R	16857089	16857289
chr2R	16891185	16891385
chr2R	17027545	17027745
chr2R	17028298	17028498
chr2R	17097340	17097540
chr2R	17265325	17265525
chr2R	17302613	17302813
chr2R	17335807	17336007
chr2R	17394606	17394806
chr2R	17420352	17420552
chr2R	17420803	17421003
chr2R	17458607	17458807
chr2R	17461388	17461588
chr2R	17462277	17462477
chr2R	17476258	17476458
chr2R	17548285	17548485
chr2R	17593108	17593308
chr2R	17593530	17593730
chr2R	17639107	17639307
chr2R	17679256	17679456
chr2R	17716454	17716654
chr2R	17717385	17717585
chr2R	17718752	17718952
chr2R	17719120	17719320
chr2R	17794177	17794377
chr2R	17796121	17796321
chr2R	17801039	17801239
chr2R	17801653	17801853
chr2R	17802473	17802673
chr2R	17804173	17804373
chr2R	17813973	17814173
chr2R	17820872	17821072
chr2R	17851476	17851676
chr2R	17855596	17855796
chr2R	17892819	17893019
chr2R	17893180	17893380
chr2R	18007861	18008061
chr2R	18008566	18008766
chr2R	18062006	18062206
chr2R	18128415	18128615
chr2R	18141153	18141353
chr2R	18156866	18157066
chr2R	18171473	18171673
chr2R	18228985	18229185
chr2R	18229763	18229963
chr2R	18230495	18230695
chr2R	18231180	18231380
chr2R	18232553	18232753
chr2R	18288734	18288934
chr2R	18309712	18309912
chr2R	18355211	18355411
chr2R	18355715	18355915
chr2R	18356446	18356646
chr2R	18357545	18357745
chr2R	18377476	18377676
chr2R	18404454	18404654
chr2R	18406759	18406959
chr2R	18413555	18413755
chr2R	18442579	18442779
chr2R	18514864	18515064
chr2R	18583298	18583498
chr2R	18611762	18611962
chr2R	18652836	18653036
chr2R	18673464	18673664
chr2R	18677573	18677773
chr2R	18717389	18717589
chr2R	18717960	18718160
chr2R	18800438	18800638
chr2R	18802646	18802846
chr2R	18806118	18806318
chr2R	18846220	18846420
chr2R	18877932	18878132
chr2R	18890448	18890648
chr2R	18973125	18973325
chr2R	19066936	19067136
chr2R	19141991	19142191
chr2R	19143047	19143247
chr2R	19144022	19144222
chr2R	19155032	19155232
chr2R	19164080	19164280
chr2R	19164465	19164665
chr2R	19179078	19179278
chr2R	19228948	19229148
chr2R	19229772	19229972
chr2R	19275509	19275709
chr2R	19293125	19293325
chr2R	19325456	19325656
chr2R	19356520	19356720
chr2R	19357143	19357343
chr2R	19395034	19395234
chr2R	19411341	19411541
chr2R	19424152	19424352
chr2R	19450041	19450241
chr2R	19455693	19455893
chr2R	19456636	19456836
chr2R	19456988	19457188
chr2R	19467364	19467564
chr2R	19468190	19468390
chr2R	19531975	19532175
chr2R	19626691	19626891
chr2R	19630670	19630870
chr2R	19631908	19632108
chr2R	19655773	19655973
chr2R	19669056	19669256
chr2R	19691951	19692151
chr2R	19825670	19825870
chr2R	19826338	19826538
chr2R	20106408	20106608
chr2R	20111184	20111384
chr2R	20319676	20319876
chr2R	20320059	20320259
chr2R	20327579	20327779
chr2R	20336787	20336987
chr2R	20423741	20423941
chr2R	20439189	20439389
chr2R	20494843	20495043
chr2R	20511146	20511346
chr2R	20533157	20533357
chr2R	20582077	20582277
chr2R	20582652	20582852
chr2R	20584343	20584543
chr2R	20587974	20588174
chr2R	20588361	20588561
chr2R	20596207	20596407
chr2R	20598132	20598332
chr2R	20646254	20646454
chr2R	20697856	20698056
chr2R	20698285	20698485
chr2R	20831814	20832014
chr2R	20836023	20836223
chr2R	20836270	20836470
chr2R	20842066	20842266
chr2R	20888710	20888910
chr2R	20896334	20896534
chr2R	20897680	20897880
chr2R	20907336	20907536
chr2R	20914982	20915182
chr2R	20916213	20916413
chr2R	20916552	20916752
chr2R	20919877	20920077
chr2R	20933047	20933247
chr2R	20935373	20935573
chr2R	20943446	20943646
chr2R	20961045	20961245
chr2R	20970269	20970469
chr2R	20997019	20997219
chr2R	21047814	21048014
chr2R	21056765	21056965
chr2R	21075928	21076128
chr2R	21101673	21101873
chr2R	21127632	21127832
chr2R	21127964	21128164
chr2R	21175124	21175324
chr2R	21193330	21193530
chr2R	21199827	21200027
chr2R	21201109	21201309
chr2R	21202726	21202926
chr2R	21230729	21230929
chr2R	21248989	21249189
chr2R	21250389	21250589
chr2R	21251046	21251246
chr2R	21362810	21363010
chr2R	21364545	21364745
chr2R	21379386	21379586
chr2R	21450455	21450655
chr2R	21475078	21475278
chr2R	21476011	21476211
chr2R	21480774	21480974
chr2R	21502143	21502343
chr2R	21502625	21502825
chr2R	21522228	21522428
chr2R	21545493	21545693
chr2R	21546470	21546670
chr2R	21550305	21550505
chr2R	21552655	21552855
chr2R	21579914	21580114
chr2R	21645713	21645913
chr2R	21645974	21646174
chr2R	21646572	21646772
chr2R	21702917	21703117
chr2R	21709461	21709661
chr2R	21711902	21712102
chr2R	21713174	21713374
chr2R	21713796	21713996
chr2R	21714607	21714807
chr2R	21720580	21720780
chr2R	21843126	21843326
chr2R	21871720	21871920
chr2R	21884369	21884569
chr2R	22047172	22047372
chr2R	22080327	22080527
chr2R	22136825	22137025
chr2R	22212956	22213156
chr2R	22242146	22242346
chr2R	22243088	22243288
chr2R	22243711	22243911
chr2R	22256352	22256552
chr2R	22270660	22270860
chr2R	22318086	22318286
chr2R	22335993	22336193
chr2R	22373208	22373408
chr2R	22382865	22383065
chr2R	22402025	22402225
chr2R	22403473	22403673
chr2R	22464799	22464999
chr2R	22512831	22513031
chr2R	22513209	22513409
chr2R	22515586	22515786
chr2R	22569779	22569979
chr2R	22570262	22570462
chr2R	22592937	22593137
chr2R	22618438	22618638
chr2R	22648404	22648604
chr2R	22648983	22649183
chr2R	22678514	22678714
chr2R	22686070	22686270
chr2R	22688974	22689174
chr2R	22689682	22689882
chr2R	22729245	22729445
chr2R	22743559	22743759
chr2R	22796883	22797083
chr2R	22797659	22797859
chr2R	22798344	22798544
chr2R	22860249	22860449
chr2R	22867782	22867982
chr2R	22934283	22934483
chr2R	22953914	22954114
chr2R	23046026	23046226
chr2R	23203923	23204123
chr2R	23296174	23296374
chr2R	23395384	23395584
chr2R	23426034	23426234
chr2R	23506865	23507065
chr2R	23551745	23551945
chr2R	23573224	23573424
chr2R	23574746	23574946
chr2R	23577245	23577445
chr2R	23580091	23580291
chr2R	23580670	23580870
chr2R	23659119	23659319
chr2R	23659545	23659745
chr2R	23666841	23667041
chr2R	23697764	23697964
chr2R	23796314	23796514
chr2R	23910156	23910356
chr2R	23978560	23978760
chr2R	24119724	24119924
chr2R	24229812	24230012
chr2R	24293311	24293511
chr2R	24329796	24329996
chr2R	24369749	24369949
chr2R	24388701	24388901
chr2R	24389549	24389749
chr2R	24390266	24390466
chr2R	24525722	24525922
chr2R	24543437	24543637
chr2R	24630910	24631110
chr2R	24711206	24711406
chr2R	24712815	24713015
chr2R	24727611	24727811
chr2R	24736686	24736886
chr2R	24738447	24738647
chr2R	24741737	24741937
chr2R	24744162	24744362
chr2R	24749669	24749869
chr2R	24768165	24768365
chr2R	24809557	24809757
chr2R	24813727	24813927
chr2R	24814622	24814822
chr2R	24844883	24845083
chr2R	24855389	24855589
chr2R	24874801	24875001
chr2R	24882544	24882744
chr2R	24891415	24891615
chr2R	24903255	24903455
chr2R	24963423	24963623
chr2R	24964333	24964533
chr2R	25010686	25010886
chr2R	25032213	25032413
chr2R	25061699	25061899
chr2R	25072821	25073021
chr2R	25084387	25084587
chr2R	25098342	25098542
chr2R	25114340	25114540
chr2R	25127544	25127744
chr2R	25226426	25226626
chr2R	25227173	25227373
chr2R	25231024	25231224
chr2R	25257411	25257611
chr3L	26617	26817
chr3L	40400	40600
chr3L	128536	128736
chr3L	129285	129485
chr3L	131340	131540
chr3L	140904	141104
chr3L	178617	178817
chr3L	271495	271695
chr3L	297253	297453
chr3L	347761	347961
chr3L	377321	377521
chr3L	378109	378309
chr3L	445849	446049
chr3L	490708	490908
chr3L	492601	492801
chr3L	539408	539608
chr3L	540152	540352
chr3L	543376	543576
chr3L	544197	544397
chr3L	545926	546126
chr3L	568092	568292
chr3L	603944	604144
chr3L	616805	617005
chr3L	630039	630239
chr3L	648545	648745
chr3L	682005	682205
chr3L	682416	682616
chr3L	685490	685690
chr3L	708132	708332
chr3L	739109	739309
chr3L	748519	748719
chr3L	749258	749458
chr3L	769262	769462
chr3L	794453	794653
chr3L	872047	872247
chr3L	881973	882173
chr3L	914981	915181
chr3L	959476	959676
chr3L	959930	960130
chr3L	1098782	1098982
chr3L	1102421	1102621
chr3L	1177268	1177468
chr3L	1177992	1178192
chr3L	1208249	1208449
chr3L	1265585	1265785
chr3L	1275225	1275425
chr3L	1275812	1276012
chr3L	1298579	1298779
chr3L	1335407	1335607
chr3L	1336241	1336441
chr3L	1364424	1364624
chr3L	1366161	1366361
chr3L	1366963	1367163
chr3L	1368002	1368202
chr3L	1447411	1447611
chr3L	1463674	1463874
chr3L	1479674	1479874
chr3L	1485487	1485687
chr3L	1516380	1516580
chr3L	1546783	1546983
chr3L	1577476	1577676
chr3L	1586469	1586669
chr3L	1593003	1593203
chr3L	1628146	1628346
chr3L	1746830	1747030
chr3L	1794695	1794895
chr3L	1859669	1859869
chr3L	1861691	1861891
chr3L	1882712	1882912
chr3L	1883243	1883443
chr3L	1885471	1885671
chr3L	1919663	1919863
chr3L	1920183	1920383
chr3L	1921015	1921215
chr3L	1967482	1967682
chr3L	2107488	2107688
chr3L	2115573	2115773
chr3L	2151780	2151980
chr3L	2182216	2182416
chr3L	2228553	2228753
chr3L	2229063	2229263
chr3L	2282468	2282668
chr3L	2411480	2411680
chr3L	2438964	2439164
chr3L	2466648	2466848
chr3L	2490024	2490224
chr3L	2585924	2586124
chr3L	2589965	2590165
chr3L	2711738	2711938
chr3L	2712626	2712826
chr3L	2808278	2808478
chr3L	2821128	2821328
chr3L	2823428	2823628
chr3L	2824792	2824992
chr3L	2828914	2829114
chr3L	2879548	2879748
chr3L	2880632	2880832
chr3L	2896478	2896678
chr3L	2904999	2905199
chr3L	3038064	3038264
chr3L	3060213	3060413
chr3L	3061187	3061387
chr3L	3069900	3070100
chr3L	3070594	3070794
chr3L	3073341	3073541
chr3L	3073916	3074116
chr3L	3077771	3077971
chr3L	3149415	3149615
chr3L	3226190	3226390
chr3L	3249899	3250099
chr3L	3250365	3250565
chr3L	3336931	3337131
chr3L	3410167	3410367
chr3L	3418015	3418215
chr3L	3419407	3419607
chr3L	3420275	3420475
chr3L	3452908	3453108
chr3L	3543556	3543756
chr3L	3545037	3545237
chr3L	3624886	3625086
chr3L	3626089	3626289
chr3L	3756846	3757046
chr3L	3757805	3758005
chr3L	3763260	3763460
chr3L	3773811	3774011
chr3L	3787215	3787415
chr3L	3787863	3788063
chr3L	3789207	3789407
chr3L	3822969	3823169
chr3L	3828215	3828415
chr3L	3830134	3830334
chr3L	3963526	3963726
chr3L	3964103	3964303
chr3L	3983688	3983888
chr3L	4062083	4062283
chr3L	4102541	4102741
chr3L	4133997	4134197
chr3L	4161119	4161319
chr3L	4167435	4167635
chr3L	4189653	4189853
chr3L	4227283	4227483
chr3L	4233764	4233964
chr3L	4252194	4252394
chr3L	4253066	4253266
chr3L	4263556	4263756
chr3L	4363555	4363755
chr3L	4380368	4380568
chr3L	4406479	4406679
chr3L	4406907	4407107
chr3L	4409949	4410149
chr3L	4414225	4414425
chr3L	4430416	4430616
chr3L	4432022	4432222
chr3L	4541964	4542164
chr3L	4542885	4543085
chr3L	4623177	4623377
chr3L	4624536	4624736
chr3L	4625725	4625925
chr3L	4626036	4626236
chr3L	4692233	4692433
chr3L	4692596	4692796
chr3L	4976289	4976489
chr3L	5184911	5185111
chr3L	5186677	5186877
chr3L	5276703	5276903
chr3L	5277125	5277325
chr3L	5277918	5278118
chr3L	5396903	5397103
chr3L	5612004	5612204
chr3L	5618831	5619031
chr3L	5620840	5621040
chr3L	5629978	5630178
chr3L	5630634	5630834
chr3L	5634240	5634440
chr3L	5640064	5640264
chr3L	5654370	5654570
chr3L	5657669	5657869
chr3L	5664684	5664884
chr3L	5665505	5665705
chr3L	5673240	5673440
chr3L	5690697	5690897
chr3L	5691213	5691413
chr3L	5726532	5726732
chr3L	5769272	5769472
chr3L	5840448	5840648
chr3L	5845641	5845841
chr3L	5881403	5881603
chr3L	5881994	5882194
chr3L	5926597	5926797
chr3L	5976058	5976258
chr3L	5976789	5976989
chr3L	6217943	6218143
chr3L	6218586	6218786
chr3L	6256579	6256779
chr3L	6256979	6257179
chr3L	6262665	6262865
chr3L	6262987	6263187
chr3L	6496266	6496466
chr3L	6550993	6551193
chr3L	6552522	6552722
chr3L	6623774	6623974
chr3L	6717063	6717263
chr3L	6789986	6790186
chr3L	6813991	6814191
chr3L	6904165	6904365
chr3L	6943451	6943651
chr3L	6964219	6964419
chr3L	6985914	6986114
chr3L	6997565	6997765
chr3L	7134327	7134527
chr3L	7135016	7135216
chr3L	7156357	7156557
chr3L	7156953	7157153
chr3L	7189716	7189916
chr3L	7203973	7204173
chr3L	7225402	7225602
chr3L	7344823	7345023
chr3L	7345149	7345349
chr3L	7381414	7381614
chr3L	7435258	7435458
chr3L	7518757	7518957
chr3L	7747063	7747263
chr3L	7781757	7781957
chr3L	7804880	7805080
chr3L	7805380	7805580
chr3L	7808826	7809026
chr3L	7821667	7821867
chr3L	7833777	7833977
chr3L	7854987	7855187
chr3L	7855498	7855698
chr3L	7856190	7856390
chr3L	7863433	7863633
chr3L	7910981	7911181
chr3L	7947989	7948189
chr3L	7978998	7979198
chr3L	7979956	7980156
chr3L	8004298	8004498
chr3L	8034952	8035152
chr3L	8063335	8063535
chr3L	8091765	8091965
chr3L	8285304	8285504
chr3L	8331977	8332177
chr3L	8439266	8439466
chr3L	8450132	8450332
chr3L	8455009	8455209
chr3L	8507067	8507267
chr3L	8512592	8512792
chr3L	8546478	8546678
chr3L	8559876	8560076
chr3L	8670205	8670405
chr3L	8670775	8670975
chr3L	8827306	8827506
chr3L	8913824	8914024
chr3L	8978826	8979026
chr3L	9005007	9005207
chr3L	9019356	9019556
chr3L	9041192	9041392
chr3L	9125350	9125550
chr3L	9127087	9127287
chr3L	9127693	9127893
chr3L	9128867	9129067
chr3L	9137683	9137883
chr3L	9155280	9155480
chr3L	9179445	9179645
chr3L	9190202	9190402
chr3L	9251735	9251935
chr3L	9267170	9267370
chr3L	9358443	9358643
chr3L	9377425	9377625
chr3L	9398547	9398747
chr3L	9401132	9401332
chr3L	9401865	9402065
chr3L	9423075	9423275
chr3L	9431976	9432176
chr3L	9462110	9462310
chr3L	9462407	9462607
chr3L	9466024	9466224
chr3L	9505246	9505446
chr3L	9505657	9505857
chr3L	9546967	9547167
chr3L	9614755	9614955
chr3L	9615461	9615661
chr3L	9675694	9675894
chr3L	9678240	9678440
chr3L	9763402	9763602
chr3L	10034772	10034972
chr3L	10187010	10187210
chr3L	10226082	10226282
chr3L	10254365	10254565
chr3L	10288275	10288475
chr3L	10289468	10289668
chr3L	10306382	10306582
chr3L	10308071	10308271
chr3L	10313568	10313768
chr3L	10325208	10325408
chr3L	10325588	10325788
chr3L	10343892	10344092
chr3L	10357936	10358136
chr3L	10500646	10500846
chr3L	10515924	10516124
chr3L	10516624	10516824
chr3L	10517696	10517896
chr3L	10521580	10521780
chr3L	10567985	10568185
chr3L	10660250	10660450
chr3L	10664628	10664828
chr3L	10665400	10665600
chr3L	10666748	10666948
chr3L	10674233	10674433
chr3L	10674986	10675186
chr3L	10675938	10676138
chr3L	10680950	10681150
chr3L	10681873	10682073
chr3L	10722675	10722875
chr3L	10737096	10737296
chr3L	10739420	10739620
chr3L	10769461	10769661
chr3L	10793613	10793813
chr3L	10811000	10811200
chr3L	10842870	10843070
chr3L	10851214	10851414
chr3L	10852370	10852570
chr3L	10856659	10856859
chr3L	10857488	10857688
chr3L	10860107	10860307
chr3L	10999916	11000116
chr3L	11007640	11007840
chr3L	11008912	11009112
chr3L	11009158	11009358
chr3L	11010355	11010555
chr3L	11046656	11046856
chr3L	11084592	11084792
chr3L	11092834	11093034
chr3L	11096391	11096591
chr3L	11118792	11118992
chr3L	11124015	11124215
chr3L	11196977	11197177
chr3L	11205737	11205937
chr3L	11214710	11214910
chr3L	11215117	11215317
chr3L	11215601	11215801
chr3L	11242795	11242995
chr3L	11246060	11246260
chr3L	11247927	11248127
chr3L	11252090	11252290
chr3L	11294815	11295015
chr3L	11337654	11337854
chr3L	11428506	11428706
chr3L	11487332	11487532
chr3L	11493467	11493667
chr3L	11534493	11534693
chr3L	11553347	11553547
chr3L	11554801	11555001
chr3L	11557354	11557554
chr3L	11586805	11587005
chr3L	11587682	11587882
chr3L	11588540	11588740
chr3L	11591746	11591946
chr3L	11596574	11596774
chr3L	11707942	11708142
chr3L	11765072	11765272
chr3L	11789203	11789403
chr3L	11819928	11820128
chr3L	11821948	11822148
chr3L	11832619	11832819
chr3L	11833040	11833240
chr3L	12081799	12081999
chr3L	12147065	12147265
chr3L	12163853	12164053
chr3L	12232003	12232203
chr3L	12265830	12266030
chr3L	12328864	12329064
chr3L	12434504	12434704
chr3L	12468101	12468301
chr3L	12490074	12490274
chr3L	12515764	12515964
chr3L	12580226	12580426
chr3L	12580939	12581139
chr3L	12609415	12609615
chr3L	12627763	12627963
chr3L	12693361	12693561
chr3L	12791044	12791244
chr3L	12804412	12804612
chr3L	12804861	12805061
chr3L	12832556	12832756
chr3L	12892488	12892688
chr3L	13113980	13114180
chr3L	13227681	13227881
chr3L	13228455	13228655
chr3L	13236949	13237149
chr3L	13314228	13314428
chr3L	13401140	13401340
chr3L	13403570	13403770
chr3L	13477192	13477392
chr3L	13480246	13480446
chr3L	13614050	13614250
chr3L	13667358	13667558
chr3L	13667845	13668045
chr3L	13884863	13885063
chr3L	13887433	13887633
chr3L	13904646	13904846
chr3L	13919967	13920167
chr3L	13920559	13920759
chr3L	13922944	13923144
chr3L	13923995	13924195
chr3L	13924738	13924938
chr3L	13925309	13925509
chr3L	13934966	13935166
chr3L	13949510	13949710
chr3L	13991412	13991612
chr3L	13993445	13993645
chr3L	14038271	14038471
chr3L	14108230	14108430
chr3L	14131623	14131823
chr3L	14177562	14177762
chr3L	14201132	14201332
chr3L	14205223	14205423
chr3L	14219720	14219920
chr3L	14272202	14272402
chr3L	14272889	14273089
chr3L	14274117	14274317
chr3L	14409836	14410036
chr3L	14410374	14410574
chr3L	14448592	14448792
chr3L	14449398	14449598
chr3L	14523072	14523272
chr3L	14550985	14551185
chr3L	14551191	14551391
chr3L	14599593	14599793
chr3L	14600695	14600895
chr3L	14613347	14613547
chr3L	14622615	14622815
chr3L	14624908	14625108
chr3L	14632560	14632760
chr3L	14634642	14634842
chr3L	14660513	14660713
chr3L	14755129	14755329
chr3L	14756442	14756642
chr3L	14757302	14757502
chr3L	14757998	14758198
chr3L	14758856	14759056
chr3L	14760041	14760241
chr3L	14775778	14775978
chr3L	14785463	14785663
chr3L	14852011	14852211
chr3L	14905400	14905600
chr3L	14968316	14968516
chr3L	14969221	14969421
chr3L	14972419	14972619
chr3L	14977634	14977834
chr3L	14987198	14987398
chr3L	15021126	15021326
chr3L	15079419	15079619
chr3L	15088597	15088797
chr3L	15090370	15090570
chr3L	15094339	15094539
chr3L	15098642	15098842
chr3L	15099151	15099351
chr3L	15101598	15101798
chr3L	15104348	15104548
chr3L	15125302	15125502
chr3L	15141835	15142035
chr3L	15146904	15147104
chr3L	15234369	15234569
chr3L	15235453	15235653
chr3L	15315462	15315662
chr3L	15325604	15325804
chr3L	15329605	15329805
chr3L	15336462	15336662
chr3L	15507574	15507774
chr3L	15510878	15511078
chr3L	15511790	15511990
chr3L	15532396	15532596
chr3L	15535206	15535406
chr3L	15535985	15536185
chr3L	15588118	15588318
chr3L	15593460	15593660
chr3L	15619792	15619992
chr3L	15628440	15628640
chr3L	15700005	15700205
chr3L	15728346	15728546
chr3L	15729345	15729545
chr3L	15815607	15815807
chr3L	15825673	15825873
chr3L	15924859	15925059
chr3L	15988378	15988578
chr3L	16015743	16015943
chr3L	16023274	16023474
chr3L	16029066	16029266
chr3L	16043790	16043990
chr3L	16046866	16047066
chr3L	16047187	16047387
chr3L	16050155	16050355
chr3L	16052512	16052712
chr3L	16078549	16078749
chr3L	16164271	16164471
chr3L	16164688	16164888
chr3L	16177615	16177815
chr3L	16211470	16211670
chr3L	16222655	16222855
chr3L	16241325	16241525
chr3L	16252319	16252519
chr3L	16254994	16255194
chr3L	16288417	16288617
chr3L	16366437	16366637
chr3L	16408350	16408550
chr3L	16408731	16408931
chr3L	16410612	16410812
chr3L	16411530	16411730
chr3L	16452042	16452242
chr3L	16483612	16483812
chr3L	16484072	16484272
chr3L	16485373	16485573
chr3L	16489487	16489687
chr3L	16493851	16494051
chr3L	16494577	16494777
chr3L	16572333	16572533
chr3L	16645682	16645882
chr3L	16660112	16660312
chr3L	16660756	16660956
chr3L	16661230	16661430
chr3L	16713704	16713904
chr3L	16807704	16807904
chr3L	16830017	16830217
chr3L	16845306	16845506
chr3L	16890958	16891158
chr3L	16900725	16900925
chr3L	17011058	17011258
chr3L	17012103	17012303
chr3L	17059242	17059442
chr3L	17148023	17148223
chr3L	17148788	17148988
chr3L	17149933	17150133
chr3L	17211711	17211911
chr3L	17228592	17228792
chr3L	17245723	17245923
chr3L	17378468	17378668
chr3L	17379445	17379645
chr3L	17415738	17415938
chr3L	17421484	17421684
chr3L	17487364	17487564
chr3L	17499459	17499659
chr3L	17500335	17500535
chr3L	17534528	17534728
chr3L	17563713	17563913
chr3L	17577861	17578061
chr3L	17590753	17590953
chr3L	17606836	17607036
chr3L	17619352	17619552
chr3L	17653226	17653426
chr3L	17653980	17654180
chr3L	17658665	17658865
chr3L	17659098	17659298
chr3L	17668022	17668222
chr3L	17668857	17669057
chr3L	17740416	17740616
chr3L	17757432	17757632
chr3L	17856743	17856943
chr3L	17857297	17857497
chr3L	17873086	17873286
chr3L	17873903	17874103
chr3L	17878884	17879084
chr3L	17964871	17965071
chr3L	17968698	17968898
chr3L	17971152	17971352
chr3L	17972515	17972715
chr3L	17973063	17973263
chr3L	17974650	17974850
chr3L	17975658	17975858
chr3L	17986501	17986701
chr3L	17988710	17988910
chr3L	17989340	17989540
chr3L	17989968	17990168
chr3L	17993438	17993638
chr3L	17995398	17995598
chr3L	17999484	17999684
chr3L	17999855	18000055
chr3L	18005380	18005580
chr3L	18016659	18016859
chr3L	18022097	18022297
chr3L	18022772	18022972
chr3L	18029553	18029753
chr3L	18057098	18057298
chr3L	18061824	18062024
chr3L	18063292	18063492
chr3L	18064826	18065026
chr3L	18066453	18066653
chr3L	18139201	18139401
chr3L	18148229	18148429
chr3L	18167166	18167366
chr3L	18185646	18185846
chr3L	18186220	18186420
chr3L	18186897	18187097
chr3L	18221134	18221334
chr3L	18234220	18234420
chr3L	18304455	18304655
[truncated: 2,176 more rows]

## Sheet: Stage 5 (sfGFP-GAF(N))
chromosome	start	end
chr2L	5738	5938
chr2L	6631	6831
chr2L	7639	7839
chr2L	66845	67045
chr2L	107911	108111
chr2L	109173	109373
chr2L	158963	159163
chr2L	160918	161118
chr2L	161555	161755
chr2L	161825	162025
chr2L	166853	167053
chr2L	219739	219939
chr2L	220580	220780
chr2L	222040	222240
chr2L	223275	223475
chr2L	224029	224229
chr2L	246625	246825
chr2L	247327	247527
chr2L	248283	248483
chr2L	249188	249388
chr2L	249863	250063
chr2L	277236	277436
chr2L	294995	295195
chr2L	368818	369018
chr2L	377768	377968
chr2L	414668	414868
chr2L	431019	431219
chr2L	431675	431875
chr2L	441877	442077
chr2L	455458	455658
chr2L	472210	472410
chr2L	479037	479237
chr2L	480796	480996
chr2L	486986	487186
chr2L	490624	490824
chr2L	491948	492148
chr2L	510576	510776
chr2L	516621	516821
chr2L	518224	518424
chr2L	519178	519378
chr2L	521056	521256
chr2L	521665	521865
chr2L	522341	522541
chr2L	523510	523710
chr2L	568068	568268
chr2L	590090	590290
chr2L	594742	594942
chr2L	597020	597220
chr2L	597876	598076
chr2L	626892	627092
chr2L	685320	685520
chr2L	701892	702092
chr2L	702697	702897
chr2L	713696	713896
chr2L	715232	715432
chr2L	821309	821509
chr2L	825905	826105
chr2L	826495	826695
chr2L	850032	850232
chr2L	850994	851194
chr2L	865773	865973
chr2L	867276	867476
chr2L	868292	868492
chr2L	870944	871144
chr2L	901114	901314
chr2L	901557	901757
chr2L	1062609	1062809
chr2L	1063130	1063330
chr2L	1068233	1068433
chr2L	1068659	1068859
chr2L	1077064	1077264
chr2L	1077785	1077985
chr2L	1118189	1118389
chr2L	1118995	1119195
chr2L	1157817	1158017
chr2L	1158620	1158820
chr2L	1420333	1420533
chr2L	1421701	1421901
chr2L	1422141	1422341
chr2L	1429606	1429806
chr2L	1478511	1478711
chr2L	1517988	1518188
chr2L	1614156	1614356
chr2L	1648795	1648995
chr2L	1649989	1650189
chr2L	1651064	1651264
chr2L	1663162	1663362
chr2L	1727986	1728186
chr2L	1737327	1737527
chr2L	1886410	1886610
chr2L	1909817	1910017
chr2L	1954614	1954814
chr2L	1958190	1958390
chr2L	1958375	1958575
chr2L	1960978	1961178
chr2L	1970503	1970703
chr2L	1971462	1971662
chr2L	1972747	1972947
chr2L	1980718	1980918
chr2L	2013927	2014127
chr2L	2037548	2037748
chr2L	2130332	2130532
chr2L	2147153	2147353
chr2L	2155808	2156008
chr2L	2161494	2161694
chr2L	2162926	2163126
chr2L	2163743	2163943
chr2L	2164805	2165005
chr2L	2172595	2172795
chr2L	2173601	2173801
chr2L	2175382	2175582
chr2L	2178697	2178897
chr2L	2181755	2181955
chr2L	2192356	2192556
chr2L	2197079	2197279
chr2L	2200378	2200578
chr2L	2202382	2202582
chr2L	2217189	2217389
chr2L	2221888	2222088
chr2L	2227234	2227434
chr2L	2242173	2242373
chr2L	2363491	2363691
chr2L	2364939	2365139
chr2L	2365166	2365366
chr2L	2449693	2449893
chr2L	2450986	2451186
chr2L	2454518	2454718
chr2L	2456596	2456796
chr2L	2492729	2492929
chr2L	2493291	2493491
chr2L	2494491	2494691
chr2L	2525288	2525488
chr2L	2576647	2576847
chr2L	2579366	2579566
chr2L	2585370	2585570
chr2L	2629983	2630183
chr2L	2644966	2645166
chr2L	2700994	2701194
chr2L	2750959	2751159
chr2L	2753053	2753253
chr2L	2753790	2753990
chr2L	2754379	2754579
chr2L	2755323	2755523
chr2L	2755987	2756187
chr2L	2757473	2757673
chr2L	2758572	2758772
chr2L	2769992	2770192
chr2L	2798941	2799141
chr2L	2808108	2808308
chr2L	2814974	2815174
chr2L	2855949	2856149
chr2L	2857062	2857262
chr2L	2858069	2858269
chr2L	2862395	2862595
chr2L	2874750	2874950
chr2L	2885018	2885218
chr2L	2885935	2886135
chr2L	2888120	2888320
chr2L	2888872	2889072
chr2L	2889258	2889458
chr2L	2897186	2897386
chr2L	2908899	2909099
chr2L	2909543	2909743
chr2L	2944937	2945137
chr2L	2955924	2956124
chr2L	2957901	2958101
chr2L	2979192	2979392
chr2L	2999182	2999382
chr2L	2999837	3000037
chr2L	3000563	3000763
chr2L	3072234	3072434
chr2L	3095034	3095234
chr2L	3158675	3158875
chr2L	3302092	3302292
chr2L	3303136	3303336
chr2L	3354855	3355055
chr2L	3426045	3426245
chr2L	3426862	3427062
chr2L	3466042	3466242
chr2L	3469916	3470116
chr2L	3476561	3476761
chr2L	3478288	3478488
chr2L	3538986	3539186
chr2L	3539509	3539709
chr2L	3540066	3540266
chr2L	3580826	3581026
chr2L	3594224	3594424
chr2L	3606514	3606714
chr2L	3632056	3632256
chr2L	3632924	3633124
chr2L	3655874	3656074
chr2L	3656397	3656597
chr2L	3656805	3657005
chr2L	3657468	3657668
chr2L	3658123	3658323
chr2L	3662408	3662608
chr2L	3771568	3771768
chr2L	3772810	3773010
chr2L	3789701	3789901
chr2L	3803793	3803993
chr2L	3806245	3806445
chr2L	3813339	3813539
chr2L	3825494	3825694
chr2L	3836615	3836815
chr2L	3862574	3862774
chr2L	3872394	3872594
chr2L	3888790	3888990
chr2L	3896068	3896268
chr2L	3991831	3992031
chr2L	3992459	3992659
chr2L	4028268	4028468
chr2L	4028818	4029018
chr2L	4030278	4030478
chr2L	4030713	4030913
chr2L	4031271	4031471
chr2L	4031762	4031962
chr2L	4045237	4045437
chr2L	4094282	4094482
chr2L	4197348	4197548
chr2L	4220382	4220582
chr2L	4221754	4221954
chr2L	4222457	4222657
chr2L	4281397	4281597
chr2L	4281918	4282118
chr2L	4282980	4283180
chr2L	4284148	4284348
chr2L	4287035	4287235
chr2L	4301493	4301693
chr2L	4333762	4333962
chr2L	4346792	4346992
chr2L	4368712	4368912
chr2L	4370620	4370820
chr2L	4371792	4371992
chr2L	4375200	4375400
chr2L	4454391	4454591
chr2L	4458235	4458435
chr2L	4592028	4592228
chr2L	4595040	4595240
chr2L	4614462	4614662
chr2L	4820072	4820272
chr2L	4820772	4820972
chr2L	4821205	4821405
chr2L	4837924	4838124
chr2L	4852680	4852880
chr2L	4880444	4880644
chr2L	4892090	4892290
chr2L	4906705	4906905
chr2L	4907147	4907347
chr2L	4915952	4916152
chr2L	4971465	4971665
chr2L	4977119	4977319
chr2L	4997684	4997884
chr2L	4998959	4999159
chr2L	5000300	5000500
chr2L	5000746	5000946
chr2L	5001380	5001580
chr2L	5004156	5004356
chr2L	5004887	5005087
chr2L	5009679	5009879
chr2L	5024801	5025001
chr2L	5030565	5030765
chr2L	5037401	5037601
chr2L	5043123	5043323
chr2L	5055006	5055206
chr2L	5070850	5071050
chr2L	5073582	5073782
chr2L	5079378	5079578
chr2L	5093001	5093201
chr2L	5093416	5093616
chr2L	5093846	5094046
chr2L	5096889	5097089
chr2L	5107752	5107952
chr2L	5108252	5108452
chr2L	5237371	5237571
chr2L	5273324	5273524
chr2L	5274224	5274424
chr2L	5278509	5278709
chr2L	5293117	5293317
chr2L	5296965	5297165
chr2L	5305671	5305871
chr2L	5306570	5306770
chr2L	5325359	5325559
chr2L	5326667	5326867
chr2L	5400589	5400789
chr2L	5403693	5403893
chr2L	5421763	5421963
chr2L	5461304	5461504
chr2L	5542366	5542566
chr2L	5542938	5543138
chr2L	5547101	5547301
chr2L	5658584	5658784
chr2L	5659248	5659448
chr2L	5696866	5697066
chr2L	5724550	5724750
chr2L	5789487	5789687
chr2L	5799683	5799883
chr2L	5800133	5800333
chr2L	5801874	5802074
chr2L	5805243	5805443
chr2L	5877698	5877898
chr2L	5879467	5879667
chr2L	5907313	5907513
chr2L	5925353	5925553
chr2L	5943721	5943921
chr2L	5944549	5944749
chr2L	5978324	5978524
chr2L	5980148	5980348
chr2L	5981492	5981692
chr2L	5981962	5982162
chr2L	5982460	5982660
chr2L	5983351	5983551
chr2L	5986180	5986380
chr2L	5997249	5997449
chr2L	5997924	5998124
chr2L	6010629	6010829
chr2L	6051160	6051360
chr2L	6054127	6054327
chr2L	6079060	6079260
chr2L	6081330	6081530
chr2L	6088458	6088658
chr2L	6089159	6089359
chr2L	6098929	6099129
chr2L	6109134	6109334
chr2L	6115092	6115292
chr2L	6124954	6125154
chr2L	6178717	6178917
chr2L	6178975	6179175
chr2L	6186572	6186772
chr2L	6252432	6252632
chr2L	6252792	6252992
chr2L	6323856	6324056
chr2L	6324378	6324578
chr2L	6338790	6338990
chr2L	6339308	6339508
chr2L	6374658	6374858
chr2L	6375825	6376025
chr2L	6376429	6376629
chr2L	6377352	6377552
chr2L	6455154	6455354
chr2L	6455942	6456142
chr2L	6473807	6474007
chr2L	6479386	6479586
chr2L	6479733	6479933
chr2L	6480292	6480492
chr2L	6480809	6481009
chr2L	6481436	6481636
chr2L	6498480	6498680
chr2L	6503060	6503260
chr2L	6536156	6536356
chr2L	6545253	6545453
chr2L	6557418	6557618
chr2L	6601087	6601287
chr2L	6610863	6611063
chr2L	6647362	6647562
chr2L	6647991	6648191
chr2L	6648406	6648606
chr2L	6667844	6668044
chr2L	6673802	6674002
chr2L	6723227	6723427
chr2L	6792137	6792337
chr2L	6794170	6794370
chr2L	6794504	6794704
chr2L	6795237	6795437
chr2L	6821756	6821956
chr2L	6827622	6827822
chr2L	6833677	6833877
chr2L	6921128	6921328
chr2L	6927035	6927235
chr2L	6939827	6940027
chr2L	6967576	6967776
chr2L	6971730	6971930
chr2L	7003800	7004000
chr2L	7009903	7010103
chr2L	7010673	7010873
chr2L	7032584	7032784
chr2L	7037946	7038146
chr2L	7049091	7049291
chr2L	7050029	7050229
chr2L	7056217	7056417
chr2L	7065807	7066007
chr2L	7110846	7111046
chr2L	7122023	7122223
chr2L	7188595	7188795
chr2L	7199863	7200063
chr2L	7204184	7204384
chr2L	7219413	7219613
chr2L	7219926	7220126
chr2L	7243712	7243912
chr2L	7245384	7245584
chr2L	7249456	7249656
chr2L	7306902	7307102
chr2L	7412297	7412497
chr2L	7416758	7416958
chr2L	7418576	7418776
chr2L	7419734	7419934
chr2L	7420689	7420889
chr2L	7422502	7422702
chr2L	7424986	7425186
chr2L	7495512	7495712
chr2L	7496297	7496497
chr2L	7530503	7530703
chr2L	7530851	7531051
chr2L	7532604	7532804
chr2L	7532956	7533156
chr2L	7544247	7544447
chr2L	7577014	7577214
chr2L	7611457	7611657
chr2L	7633018	7633218
chr2L	7701547	7701747
chr2L	7799840	7800040
chr2L	7811355	7811555
chr2L	7821459	7821659
chr2L	7827184	7827384
chr2L	7828260	7828460
chr2L	7828982	7829182
chr2L	7832811	7833011
chr2L	7855269	7855469
chr2L	7885339	7885539
chr2L	7887419	7887619
chr2L	7940726	7940926
chr2L	7966712	7966912
chr2L	7976855	7977055
chr2L	7984186	7984386
chr2L	7985110	7985310
chr2L	7991677	7991877
chr2L	7994070	7994270
chr2L	7994403	7994603
chr2L	7998748	7998948
chr2L	8031706	8031906
chr2L	8042802	8043002
chr2L	8043280	8043480
chr2L	8082924	8083124
chr2L	8083693	8083893
chr2L	8084720	8084920
chr2L	8085607	8085807
chr2L	8088419	8088619
chr2L	8104140	8104340
chr2L	8148784	8148984
chr2L	8162944	8163144
chr2L	8214137	8214337
chr2L	8274646	8274846
chr2L	8277640	8277840
chr2L	8278352	8278552
chr2L	8287526	8287726
chr2L	8290628	8290828
chr2L	8300747	8300947
chr2L	8302859	8303059
chr2L	8328880	8329080
chr2L	8364655	8364855
chr2L	8403419	8403619
chr2L	8415150	8415350
chr2L	8415684	8415884
chr2L	8416426	8416626
chr2L	8419297	8419497
chr2L	8420240	8420440
chr2L	8424894	8425094
chr2L	8478553	8478753
chr2L	8511848	8512048
chr2L	8522002	8522202
chr2L	8528388	8528588
chr2L	8534991	8535191
chr2L	8536303	8536503
chr2L	8542717	8542917
chr2L	8543204	8543404
chr2L	8544000	8544200
chr2L	8587963	8588163
chr2L	8675668	8675868
chr2L	8709027	8709227
chr2L	8718039	8718239
chr2L	8718110	8718310
chr2L	8735743	8735943
chr2L	8740099	8740299
chr2L	8740278	8740478
chr2L	8898561	8898761
chr2L	8949904	8950104
chr2L	8950510	8950710
chr2L	8951156	8951356
chr2L	8951478	8951678
chr2L	8958033	8958233
chr2L	8984894	8985094
chr2L	8989106	8989306
chr2L	8997428	8997628
chr2L	9125691	9125891
chr2L	9176236	9176436
chr2L	9176756	9176956
chr2L	9179373	9179573
chr2L	9203546	9203746
chr2L	9205260	9205460
chr2L	9229836	9230036
chr2L	9256528	9256728
chr2L	9330593	9330793
chr2L	9416329	9416529
chr2L	9437309	9437509
chr2L	9448312	9448512
chr2L	9449247	9449447
chr2L	9449700	9449900
chr2L	9493973	9494173
chr2L	9494653	9494853
chr2L	9496469	9496669
chr2L	9497311	9497511
chr2L	9512487	9512687
chr2L	9521576	9521776
chr2L	9522947	9523147
chr2L	9566296	9566496
chr2L	9567626	9567826
chr2L	9568397	9568597
chr2L	9568727	9568927
chr2L	9569907	9570107
chr2L	9570232	9570432
chr2L	9581675	9581875
chr2L	9587206	9587406
chr2L	9608107	9608307
chr2L	9613323	9613523
chr2L	9616712	9616912
chr2L	9697933	9698133
chr2L	9698505	9698705
chr2L	9699251	9699451
chr2L	9699698	9699898
chr2L	9705293	9705493
chr2L	9705899	9706099
chr2L	9711205	9711405
chr2L	9715276	9715476
chr2L	9723537	9723737
chr2L	9731325	9731525
chr2L	9744705	9744905
chr2L	9746687	9746887
chr2L	9758176	9758376
chr2L	9758949	9759149
chr2L	9782181	9782381
chr2L	9861355	9861555
chr2L	9863578	9863778
chr2L	9874632	9874832
chr2L	9879668	9879868
chr2L	9890810	9891010
chr2L	9918097	9918297
chr2L	9929190	9929390
chr2L	9984031	9984231
chr2L	9984603	9984803
chr2L	10003666	10003866
chr2L	10009286	10009486
chr2L	10009936	10010136
chr2L	10180266	10180466
chr2L	10200918	10201118
chr2L	10208987	10209187
chr2L	10220821	10221021
chr2L	10221230	10221430
chr2L	10232272	10232472
chr2L	10263516	10263716
chr2L	10314331	10314531
chr2L	10339342	10339542
chr2L	10353945	10354145
chr2L	10356654	10356854
chr2L	10387957	10388157
chr2L	10408158	10408358
chr2L	10422714	10422914
chr2L	10430887	10431087
chr2L	10457557	10457757
chr2L	10474318	10474518
chr2L	10506809	10507009
chr2L	10646830	10647030
chr2L	10647993	10648193
chr2L	10967347	10967547
chr2L	10986092	10986292
chr2L	10989268	10989468
chr2L	11045233	11045433
chr2L	11065697	11065897
chr2L	11067011	11067211
chr2L	11071026	11071226
chr2L	11071825	11072025
chr2L	11086514	11086714
chr2L	11106651	11106851
chr2L	11155687	11155887
chr2L	11167290	11167490
chr2L	11168814	11169014
chr2L	11206901	11207101
chr2L	11211582	11211782
chr2L	11268957	11269157
chr2L	11278015	11278215
chr2L	11358543	11358743
chr2L	11445762	11445962
chr2L	11447753	11447953
chr2L	11452551	11452751
chr2L	11487521	11487721
chr2L	11491351	11491551
chr2L	11516775	11516975
chr2L	11517138	11517338
chr2L	11581743	11581943
chr2L	11804837	11805037
chr2L	11806998	11807198
chr2L	11808042	11808242
chr2L	11808758	11808958
chr2L	11809259	11809459
chr2L	11816474	11816674
chr2L	11829329	11829529
chr2L	11949037	11949237
chr2L	11967847	11968047
chr2L	11968946	11969146
chr2L	11970407	11970607
chr2L	11971138	11971338
chr2L	11977810	11978010
chr2L	12003699	12003899
chr2L	12004346	12004546
chr2L	12007414	12007614
chr2L	12010529	12010729
chr2L	12011481	12011681
chr2L	12012134	12012334
chr2L	12027327	12027527
chr2L	12044710	12044910
chr2L	12055946	12056146
chr2L	12065958	12066158
chr2L	12085835	12086035
chr2L	12093617	12093817
chr2L	12108872	12109072
chr2L	12172822	12173022
chr2L	12288621	12288821
chr2L	12364397	12364597
chr2L	12366141	12366341
chr2L	12416060	12416260
chr2L	12421872	12422072
chr2L	12434399	12434599
chr2L	12459956	12460156
chr2L	12461238	12461438
chr2L	12483043	12483243
chr2L	12483453	12483653
chr2L	12484250	12484450
chr2L	12504180	12504380
chr2L	12504929	12505129
chr2L	12507683	12507883
chr2L	12521107	12521307
chr2L	12529772	12529972
chr2L	12540388	12540588
chr2L	12543209	12543409
chr2L	12543974	12544174
chr2L	12545799	12545999
chr2L	12549093	12549293
chr2L	12587231	12587431
chr2L	12618179	12618379
chr2L	12618558	12618758
chr2L	12655878	12656078
chr2L	12678376	12678576
chr2L	12692836	12693036
chr2L	12822796	12822996
chr2L	12854594	12854794
chr2L	12975002	12975202
chr2L	12986862	12987062
chr2L	12987295	12987495
chr2L	12997837	12998037
chr2L	13004064	13004264
chr2L	13019090	13019290
chr2L	13032640	13032840
chr2L	13035978	13036178
chr2L	13158207	13158407
chr2L	13165790	13165990
chr2L	13176733	13176933
chr2L	13203685	13203885
chr2L	13211567	13211767
chr2L	13225168	13225368
chr2L	13296783	13296983
chr2L	13354597	13354797
chr2L	13378728	13378928
chr2L	13415155	13415355
chr2L	13461229	13461429
chr2L	13511532	13511732
chr2L	13512769	13512969
chr2L	13513402	13513602
chr2L	13548764	13548964
chr2L	13549162	13549362
chr2L	13550391	13550591
chr2L	13550696	13550896
chr2L	13666056	13666256
chr2L	13813680	13813880
chr2L	13829699	13829899
chr2L	13878065	13878265
chr2L	13878871	13879071
chr2L	13904361	13904561
chr2L	13905556	13905756
chr2L	13977179	13977379
chr2L	14040227	14040427
chr2L	14040949	14041149
chr2L	14049807	14050007
chr2L	14051595	14051795
chr2L	14054351	14054551
chr2L	14116229	14116429
chr2L	14118296	14118496
chr2L	14180737	14180937
chr2L	14233412	14233612
chr2L	14234089	14234289
chr2L	14234516	14234716
chr2L	14262979	14263179
chr2L	14355099	14355299
chr2L	14385274	14385474
chr2L	14470103	14470303
chr2L	14490630	14490830
chr2L	14508962	14509162
chr2L	14579624	14579824
chr2L	14581070	14581270
chr2L	14689229	14689429
chr2L	14939865	14940065
chr2L	15009953	15010153
chr2L	15013596	15013796
chr2L	15017326	15017526
chr2L	15039545	15039745
chr2L	15057039	15057239
chr2L	15057778	15057978
chr2L	15060695	15060895
chr2L	15067971	15068171
chr2L	15109201	15109401
chr2L	15111462	15111662
chr2L	15126857	15127057
chr2L	15264641	15264841
chr2L	15332667	15332867
chr2L	15333558	15333758
chr2L	15467197	15467397
chr2L	15478316	15478516
chr2L	15486429	15486629
chr2L	15491166	15491366
chr2L	15492047	15492247
chr2L	15498914	15499114
chr2L	15499530	15499730
chr2L	15731741	15731941
chr2L	15745637	15745837
chr2L	15746154	15746354
chr2L	15746834	15747034
chr2L	15747519	15747719
chr2L	15748084	15748284
chr2L	15762491	15762691
chr2L	15911817	15912017
chr2L	16000231	16000431
chr2L	16025377	16025577
chr2L	16049720	16049920
chr2L	16231307	16231507
chr2L	16234129	16234329
chr2L	16234911	16235111
chr2L	16251740	16251940
chr2L	16257496	16257696
chr2L	16268062	16268262
chr2L	16269369	16269569
chr2L	16276016	16276216
chr2L	16276855	16277055
chr2L	16280008	16280208
chr2L	16281518	16281718
chr2L	16284320	16284520
chr2L	16284889	16285089
chr2L	16285539	16285739
chr2L	16286115	16286315
chr2L	16286656	16286856
chr2L	16287359	16287559
chr2L	16288143	16288343
chr2L	16299613	16299813
chr2L	16310653	16310853
chr2L	16323439	16323639
chr2L	16325847	16326047
chr2L	16330055	16330255
chr2L	16330789	16330989
chr2L	16350862	16351062
chr2L	16352560	16352760
chr2L	16352898	16353098
chr2L	16356640	16356840
chr2L	16371486	16371686
chr2L	16405795	16405995
chr2L	16413934	16414134
chr2L	16422754	16422954
chr2L	16486310	16486510
chr2L	16491304	16491504
chr2L	16492970	16493170
chr2L	16496581	16496781
chr2L	16501310	16501510
chr2L	16520189	16520389
chr2L	16520672	16520872
chr2L	16521393	16521593
chr2L	16526327	16526527
chr2L	16532953	16533153
chr2L	16534255	16534455
chr2L	16535029	16535229
chr2L	16535716	16535916
chr2L	16543961	16544161
chr2L	16545733	16545933
chr2L	16548266	16548466
chr2L	16587983	16588183
chr2L	16588603	16588803
chr2L	16597646	16597846
chr2L	16601490	16601690
chr2L	16619229	16619429
chr2L	16679914	16680114
chr2L	16685186	16685386
chr2L	16689811	16690011
chr2L	16690426	16690626
chr2L	16715572	16715772
chr2L	16716430	16716630
chr2L	16718734	16718934
chr2L	16719698	16719898
chr2L	16720558	16720758
chr2L	16722849	16723049
chr2L	16727546	16727746
chr2L	16772730	16772930
chr2L	16787698	16787898
chr2L	16817493	16817693
chr2L	16857843	16858043
chr2L	16887931	16888131
chr2L	16888328	16888528
chr2L	16972765	16972965
chr2L	17102453	17102653
chr2L	17260649	17260849
chr2L	17382825	17383025
chr2L	17383944	17384144
chr2L	17384547	17384747
chr2L	17449713	17449913
chr2L	17473198	17473398
chr2L	17477767	17477967
chr2L	17501054	17501254
chr2L	17565875	17566075
chr2L	17589162	17589362
chr2L	17621276	17621476
chr2L	17702327	17702527
chr2L	17735667	17735867
chr2L	17751161	17751361
chr2L	17752578	17752778
chr2L	17754198	17754398
chr2L	17960322	17960522
chr2L	17963182	17963382
chr2L	18137949	18138149
chr2L	18141610	18141810
chr2L	18150062	18150262
chr2L	18150611	18150811
chr2L	18151507	18151707
chr2L	18152378	18152578
chr2L	18302860	18303060
chr2L	18320030	18320230
chr2L	18357251	18357451
chr2L	18357668	18357868
chr2L	18358121	18358321
chr2L	18443244	18443444
chr2L	18444783	18444983
chr2L	18454511	18454711
chr2L	18455557	18455757
chr2L	18456027	18456227
chr2L	18483915	18484115
chr2L	18484424	18484624
chr2L	18485263	18485463
chr2L	18590352	18590552
chr2L	18590735	18590935
chr2L	18596945	18597145
chr2L	18617132	18617332
chr2L	18629264	18629464
chr2L	18688741	18688941
chr2L	18703251	18703451
chr2L	18708547	18708747
chr2L	18777633	18777833
chr2L	18782962	18783162
chr2L	18844987	18845187
chr2L	18846183	18846383
chr2L	18846968	18847168
chr2L	18859242	18859442
chr2L	18881212	18881412
chr2L	18884758	18884958
chr2L	18895308	18895508
chr2L	18917878	18918078
chr2L	18936145	18936345
chr2L	18944233	18944433
chr2L	18947547	18947747
chr2L	18949597	18949797
chr2L	18968679	18968879
chr2L	18987191	18987391
chr2L	19009255	19009455
chr2L	19045271	19045471
chr2L	19053908	19054108
chr2L	19133714	19133914
chr2L	19134940	19135140
chr2L	19135327	19135527
chr2L	19136498	19136698
chr2L	19136949	19137149
chr2L	19154854	19155054
chr2L	19156242	19156442
chr2L	19157092	19157292
chr2L	19158279	19158479
chr2L	19158831	19159031
chr2L	19161537	19161737
chr2L	19162509	19162709
chr2L	19164861	19165061
chr2L	19165186	19165386
chr2L	19190265	19190465
chr2L	19323673	19323873
chr2L	19361967	19362167
chr2L	19362317	19362517
chr2L	19362913	19363113
chr2L	19377357	19377557
chr2L	19398970	19399170
chr2L	19414007	19414207
chr2L	19414415	19414615
chr2L	19423503	19423703
chr2L	19426043	19426243
chr2L	19426544	19426744
chr2L	19444933	19445133
chr2L	19453496	19453696
chr2L	19458008	19458208
chr2L	19479765	19479965
chr2L	19508674	19508874
chr2L	19548314	19548514
chr2L	19571915	19572115
chr2L	19572581	19572781
chr2L	19572998	19573198
chr2L	19575523	19575723
chr2L	19576025	19576225
chr2L	19576521	19576721
chr2L	19577144	19577344
chr2L	19577567	19577767
chr2L	19606333	19606533
chr2L	19702192	19702392
chr2L	19735896	19736096
chr2L	19737269	19737469
chr2L	19791173	19791373
chr2L	19791701	19791901
chr2L	19795732	19795932
chr2L	19810655	19810855
chr2L	19810946	19811146
chr2L	19811660	19811860
chr2L	19819937	19820137
chr2L	19820709	19820909
chr2L	19935140	19935340
chr2L	20065545	20065745
chr2L	20066260	20066460
chr2L	20075486	20075686
chr2L	20082459	20082659
chr2L	20084912	20085112
chr2L	20098288	20098488
chr2L	20104615	20104815
chr2L	20115876	20116076
chr2L	20117497	20117697
chr2L	20118127	20118327
chr2L	20120419	20120619
chr2L	20148428	20148628
chr2L	20204897	20205097
chr2L	20310797	20310997
chr2L	20311068	20311268
chr2L	20350000	20350200
chr2L	20350281	20350481
chr2L	20417034	20417234
chr2L	20494482	20494682
chr2L	20561510	20561710
chr2L	20561968	20562168
chr2L	20638460	20638660
chr2L	20647454	20647654
chr2L	20675904	20676104
chr2L	20758033	20758233
chr2L	20758669	20758869
chr2L	20770500	20770700
chr2L	20774344	20774544
chr2L	20776961	20777161
chr2L	20793899	20794099
chr2L	20800457	20800657
chr2L	20890330	20890530
chr2L	20917382	20917582
chr2L	20918838	20919038
chr2L	20922837	20923037
chr2L	21052041	21052241
chr2L	21096756	21096956
chr2L	21104543	21104743
chr2L	21105187	21105387
chr2L	21107730	21107930
chr2L	21108017	21108217
chr2L	21141792	21141992
chr2L	21151249	21151449
chr2L	21178640	21178840
chr2L	21214458	21214658
chr2L	21215038	21215238
chr2L	21221880	21222080
chr2L	21237099	21237299
chr2L	21237768	21237968
chr2L	21250950	21251150
chr2L	21251851	21252051
chr2L	21309440	21309640
chr2L	21310042	21310242
chr2L	21313187	21313387
chr2L	21570718	21570918
chr2L	21571368	21571568
chr2L	21571671	21571871
chr2L	21572967	21573167
chr2L	21618009	21618209
chr2L	21618729	21618929
chr2L	21627839	21628039
chr2L	21629307	21629507
chr2L	21629843	21630043
chr2L	21632980	21633180
chr2L	21633251	21633451
chr2L	21682033	21682233
chr2L	21683244	21683444
chr2L	21725754	21725954
chr2L	21753699	21753899
chr2L	21757416	21757616
chr2L	21794686	21794886
chr2L	21795335	21795535
chr2L	21828411	21828611
chr2L	21846803	21847003
chr2L	21847635	21847835
chr2L	21849824	21850024
chr2L	21851542	21851742
chr2L	21866503	21866703
chr2L	21871538	21871738
chr2L	21899391	21899591
chr2L	22019032	22019232
chr2L	22024464	22024664
chr2L	22078563	22078763
chr2L	22121717	22121917
chr2L	22134167	22134367
chr2L	22144158	22144358
chr2L	22151924	22152124
chr2L	22152276	22152476
chr2L	22153347	22153547
chr2L	22169120	22169320
chr2L	22220767	22220967
chr2L	22255434	22255634
chr2L	22261063	22261263
chr2L	22336047	22336247
chr2L	22339436	22339636
chr2L	22339737	22339937
chr2L	22361179	22361379
chr2L	22536676	22536876
chr2L	22551776	22551976
chr2L	22630882	22631082
chr2L	22631835	22632035
chr2L	22632849	22633049
chr2L	22714442	22714642
chr2L	22756305	22756505
chr2L	22929573	22929773
chr2L	22989137	22989337
chr2L	23068815	23069015
chr2L	23170772	23170972
chr2L	23189350	23189550
chr2L	23315093	23315293
chr2L	23512742	23512942
chr2R	901859	902059
chr2R	947046	947246
chr2R	1089240	1089440
chr2R	1093041	1093241
chr2R	1369422	1369622
chr2R	1412106	1412306
chr2R	1511031	1511231
chr2R	1512808	1513008
chr2R	1513920	1514120
chr2R	1515309	1515509
chr2R	1763428	1763628
chr2R	1921534	1921734
chr2R	1984665	1984865
chr2R	1994667	1994867
chr2R	2309438	2309638
chr2R	2498341	2498541
chr2R	2562582	2562782
chr2R	2562710	2562910
chr2R	2830951	2831151
chr2R	2832244	2832444
chr2R	2843011	2843211
chr2R	2885636	2885836
chr2R	2981309	2981509
chr2R	3032019	3032219
chr2R	3292651	3292851
chr2R	3492765	3492965
chr2R	3934525	3934725
chr2R	3939973	3940173
chr2R	4012711	4012911
chr2R	4016359	4016559
chr2R	4130911	4131111
chr2R	4186358	4186558
chr2R	4188102	4188302
chr2R	4193348	4193548
chr2R	4471120	4471320
chr2R	4593116	4593316
chr2R	4606162	4606362
chr2R	4618816	4619016
chr2R	4639796	4639996
chr2R	4707946	4708146
chr2R	4709145	4709345
chr2R	4750300	4750500
chr2R	4830266	4830466
chr2R	5041538	5041738
chr2R	5089493	5089693
chr2R	5126573	5126773
chr2R	5141543	5141743
chr2R	5262224	5262424
chr2R	5262478	5262678
chr2R	5374138	5374338
chr2R	5426359	5426559
chr2R	5531119	5531319
chr2R	5664353	5664553
chr2R	5701939	5702139
chr2R	5710179	5710379
chr2R	5726919	5727119
chr2R	5773094	5773294
chr2R	5782228	5782428
chr2R	5981865	5982065
chr2R	5992721	5992921
chr2R	6037626	6037826
chr2R	6102479	6102679
chr2R	6119240	6119440
chr2R	6120517	6120717
chr2R	6132004	6132204
chr2R	6133101	6133301
chr2R	6156341	6156541
chr2R	6157070	6157270
chr2R	6166775	6166975
chr2R	6168315	6168515
chr2R	6168982	6169182
chr2R	6193816	6194016
chr2R	6196266	6196466
chr2R	6220380	6220580
chr2R	6220946	6221146
chr2R	6221413	6221613
chr2R	6236058	6236258
chr2R	6287534	6287734
chr2R	6341720	6341920
chr2R	6463030	6463230
chr2R	6494332	6494532
chr2R	6501660	6501860
chr2R	6515859	6516059
chr2R	6527885	6528085
chr2R	6575108	6575308
chr2R	6585873	6586073
chr2R	6594358	6594558
chr2R	6605965	6606165
chr2R	6610308	6610508
chr2R	6610881	6611081
chr2R	6613042	6613242
chr2R	6613509	6613709
chr2R	6628269	6628469
chr2R	6630441	6630641
chr2R	6631498	6631698
chr2R	6632396	6632596
chr2R	6633017	6633217
chr2R	6656336	6656536
chr2R	6661926	6662126
chr2R	6663133	6663333
chr2R	6680332	6680532
chr2R	6696594	6696794
chr2R	6741789	6741989
chr2R	6749175	6749375
chr2R	6757150	6757350
chr2R	6810898	6811098
chr2R	6828183	6828383
chr2R	6871987	6872187
chr2R	6872630	6872830
chr2R	6885721	6885921
chr2R	6985626	6985826
chr2R	6992746	6992946
chr2R	7012067	7012267
chr2R	7098307	7098507
chr2R	7106459	7106659
chr2R	7146945	7147145
chr2R	7170957	7171157
chr2R	7254033	7254233
chr2R	7282493	7282693
chr2R	7326790	7326990
chr2R	7352498	7352698
chr2R	7380666	7380866
chr2R	7381848	7382048
chr2R	7387197	7387397
chr2R	7407768	7407968
chr2R	7418639	7418839
chr2R	7419149	7419349
chr2R	7457456	7457656
chr2R	7458852	7459052
chr2R	7466717	7466917
chr2R	7471409	7471609
chr2R	7473693	7473893
chr2R	7481178	7481378
chr2R	7482009	7482209
chr2R	7484309	7484509
chr2R	7484730	7484930
chr2R	7488766	7488966
chr2R	7489782	7489982
chr2R	7490452	7490652
chr2R	7492313	7492513
chr2R	7513846	7514046
chr2R	7529238	7529438
chr2R	7530883	7531083
chr2R	7544291	7544491
chr2R	7544987	7545187
chr2R	7597743	7597943
chr2R	7623021	7623221
chr2R	7692936	7693136
chr2R	7699356	7699556
chr2R	7722996	7723196
chr2R	7755726	7755926
chr2R	7779824	7780024
chr2R	7786228	7786428
chr2R	7812358	7812558
chr2R	7885975	7886175
chr2R	7888164	7888364
chr2R	7916743	7916943
chr2R	7959657	7959857
chr2R	7989093	7989293
chr2R	7989691	7989891
chr2R	8018863	8019063
chr2R	8030922	8031122
chr2R	8051322	8051522
chr2R	8061087	8061287
chr2R	8062473	8062673
chr2R	8064971	8065171
chr2R	8065544	8065744
chr2R	8067831	8068031
chr2R	8068635	8068835
chr2R	8083311	8083511
chr2R	8121602	8121802
chr2R	8122469	8122669
chr2R	8122908	8123108
chr2R	8129774	8129974
chr2R	8145927	8146127
chr2R	8174493	8174693
chr2R	8232294	8232494
chr2R	8237130	8237330
chr2R	8237665	8237865
chr2R	8241998	8242198
chr2R	8246183	8246383
chr2R	8301737	8301937
chr2R	8313691	8313891
chr2R	8322579	8322779
chr2R	8327149	8327349
chr2R	8375721	8375921
chr2R	8394483	8394683
chr2R	8407896	8408096
chr2R	8462352	8462552
chr2R	8565965	8566165
chr2R	8599879	8600079
chr2R	8600322	8600522
chr2R	8632464	8632664
chr2R	8647885	8648085
chr2R	8649408	8649608
chr2R	8650017	8650217
chr2R	8655849	8656049
chr2R	8656263	8656463
chr2R	8665971	8666171
chr2R	8666871	8667071
chr2R	8667607	8667807
chr2R	8668775	8668975
chr2R	8670454	8670654
chr2R	8671376	8671576
chr2R	8723738	8723938
chr2R	8724352	8724552
chr2R	8733338	8733538
chr2R	8798261	8798461
chr2R	8801717	8801917
chr2R	8829140	8829340
chr2R	8860154	8860354
chr2R	8862531	8862731
chr2R	8866371	8866571
chr2R	8900109	8900309
chr2R	8914409	8914609
chr2R	8928040	8928240
chr2R	8951008	8951208
chr2R	8985570	8985770
chr2R	9056292	9056492
chr2R	9059895	9060095
chr2R	9132328	9132528
chr2R	9144933	9145133
chr2R	9177241	9177441
chr2R	9198661	9198861
chr2R	9230194	9230394
chr2R	9231306	9231506
chr2R	9275031	9275231
chr2R	9275488	9275688
chr2R	9278934	9279134
chr2R	9284181	9284381
chr2R	9284797	9284997
chr2R	9292582	9292782
chr2R	9294006	9294206
chr2R	9376722	9376922
chr2R	9389934	9390134
chr2R	9398709	9398909
chr2R	9408940	9409140
chr2R	9413431	9413631
chr2R	9414184	9414384
chr2R	9426374	9426574
chr2R	9426920	9427120
chr2R	9441039	9441239
chr2R	9441491	9441691
chr2R	9441999	9442199
chr2R	9443083	9443283
chr2R	9490906	9491106
chr2R	9519079	9519279
chr2R	9519567	9519767
chr2R	9520780	9520980
chr2R	9521380	9521580
chr2R	9540500	9540700
chr2R	9546505	9546705
chr2R	9546856	9547056
chr2R	9548164	9548364
chr2R	9552856	9553056
chr2R	9553870	9554070
chr2R	9566751	9566951
chr2R	9567207	9567407
chr2R	9577898	9578098
chr2R	9578909	9579109
chr2R	9587053	9587253
chr2R	9590771	9590971
chr2R	9683831	9684031
chr2R	9711608	9711808
chr2R	9712168	9712368
chr2R	9820127	9820327
chr2R	9842454	9842654
chr2R	9875140	9875340
chr2R	9882221	9882421
chr2R	9891584	9891784
chr2R	9929656	9929856
chr2R	9933812	9934012
chr2R	9949513	9949713
chr2R	9955180	9955380
chr2R	9958783	9958983
chr2R	9968987	9969187
chr2R	9979134	9979334
chr2R	9980903	9981103
chr2R	9981354	9981554
chr2R	9988967	9989167
chr2R	10026005	10026205
chr2R	10048029	10048229
chr2R	10056644	10056844
chr2R	10057784	10057984
chr2R	10078218	10078418
chr2R	10096776	10096976
chr2R	10099604	10099804
chr2R	10100833	10101033
chr2R	10101571	10101771
chr2R	10117514	10117714
chr2R	10124081	10124281
chr2R	10124714	10124914
chr2R	10134693	10134893
chr2R	10142233	10142433
chr2R	10211410	10211610
chr2R	10214105	10214305
chr2R	10219666	10219866
chr2R	10225055	10225255
chr2R	10238342	10238542
chr2R	10239163	10239363
chr2R	10259567	10259767
chr2R	10276372	10276572
chr2R	10278416	10278616
chr2R	10281370	10281570
chr2R	10418212	10418412
chr2R	10421296	10421496
chr2R	10421877	10422077
chr2R	10423253	10423453
chr2R	10423986	10424186
chr2R	10428202	10428402
chr2R	10428954	10429154
chr2R	10429915	10430115
chr2R	10430356	10430556
chr2R	10432420	10432620
chr2R	10437898	10438098
chr2R	10468378	10468578
chr2R	10477822	10478022
chr2R	10478454	10478654
chr2R	10485462	10485662
chr2R	10486735	10486935
chr2R	10515552	10515752
chr2R	10522922	10523122
chr2R	10527063	10527263
chr2R	10530586	10530786
chr2R	10534210	10534410
chr2R	10535057	10535257
chr2R	10536112	10536312
chr2R	10540511	10540711
chr2R	10541634	10541834
chr2R	10542338	10542538
chr2R	10542840	10543040
chr2R	10543354	10543554
chr2R	10551928	10552128
chr2R	10554021	10554221
chr2R	10555223	10555423
chr2R	10558676	10558876
chr2R	10559723	10559923
chr2R	10566558	10566758
chr2R	10567058	10567258
chr2R	10569031	10569231
chr2R	10569415	10569615
chr2R	10583235	10583435
chr2R	10583582	10583782
chr2R	10596289	10596489
chr2R	10618484	10618684
chr2R	10675095	10675295
chr2R	10682567	10682767
chr2R	10781981	10782181
chr2R	10782774	10782974
chr2R	10798699	10798899
chr2R	10805138	10805338
chr2R	10806546	10806746
chr2R	10807323	10807523
chr2R	10809482	10809682
chr2R	10810900	10811100
chr2R	10819795	10819995
chr2R	10843885	10844085
chr2R	10861445	10861645
chr2R	10874668	10874868
chr2R	10886668	10886868
chr2R	10899035	10899235
chr2R	11107514	11107714
chr2R	11116353	11116553
chr2R	11145083	11145283
chr2R	11175297	11175497
chr2R	11189128	11189328
chr2R	11195479	11195679
chr2R	11197256	11197456
chr2R	11198162	11198362
chr2R	11198918	11199118
chr2R	11199725	11199925
chr2R	11202293	11202493
chr2R	11203263	11203463
chr2R	11231949	11232149
chr2R	11232401	11232601
chr2R	11232871	11233071
chr2R	11237475	11237675
chr2R	11251927	11252127
chr2R	11283867	11284067
chr2R	11289324	11289524
chr2R	11365864	11366064
chr2R	11366754	11366954
chr2R	11367395	11367595
chr2R	11371073	11371273
chr2R	11397387	11397587
chr2R	11450727	11450927
chr2R	11451809	11452009
chr2R	11452595	11452795
chr2R	11469512	11469712
chr2R	11471067	11471267
chr2R	11475534	11475734
chr2R	11493974	11494174
chr2R	11527943	11528143
chr2R	11529560	11529760
chr2R	11592402	11592602
chr2R	11593077	11593277
chr2R	11594032	11594232
chr2R	11597804	11598004
chr2R	11602339	11602539
chr2R	11603481	11603681
chr2R	11604497	11604697
chr2R	11604962	11605162
chr2R	11606267	11606467
chr2R	11615074	11615274
chr2R	11616001	11616201
chr2R	11626494	11626694
chr2R	11629663	11629863
chr2R	11632423	11632623
chr2R	11633483	11633683
chr2R	11635234	11635434
chr2R	11637272	11637472
chr2R	11639540	11639740
chr2R	11640511	11640711
chr2R	11648486	11648686
chr2R	11650958	11651158
chr2R	11658030	11658230
chr2R	11659075	11659275
chr2R	11662814	11663014
chr2R	11665546	11665746
chr2R	11666633	11666833
chr2R	11712105	11712305
chr2R	11756471	11756671
chr2R	11757695	11757895
chr2R	11790012	11790212
chr2R	11825177	11825377
chr2R	11891988	11892188
chr2R	11892855	11893055
chr2R	12019795	12019995
chr2R	12025165	12025365
chr2R	12054800	12055000
chr2R	12099303	12099503
chr2R	12101151	12101351
chr2R	12102436	12102636
chr2R	12111232	12111432
chr2R	12150911	12151111
chr2R	12168583	12168783
chr2R	12200762	12200962
chr2R	12212613	12212813
chr2R	12252885	12253085
chr2R	12259256	12259456
chr2R	12261351	12261551
chr2R	12271532	12271732
chr2R	12344803	12345003
chr2R	12412806	12413006
chr2R	12437596	12437796
chr2R	12451389	12451589
chr2R	12453171	12453371
chr2R	12454081	12454281
chr2R	12455005	12455205
chr2R	12456715	12456915
chr2R	12462045	12462245
chr2R	12462762	12462962
chr2R	12462895	12463095
chr2R	12463511	12463711
chr2R	12528895	12529095
chr2R	12587008	12587208
chr2R	12588276	12588476
chr2R	12589141	12589341
chr2R	12589540	12589740
chr2R	12591690	12591890
chr2R	12592319	12592519
chr2R	12592733	12592933
chr2R	12593446	12593646
chr2R	12612283	12612483
chr2R	12612592	12612792
chr2R	12636522	12636722
chr2R	12665853	12666053
chr2R	12686713	12686913
chr2R	12687250	12687450
chr2R	12705006	12705206
chr2R	12743181	12743381
chr2R	12776800	12777000
chr2R	12780311	12780511
chr2R	12869377	12869577
chr2R	12880145	12880345
chr2R	12884500	12884700
chr2R	12886847	12887047
chr2R	12904435	12904635
chr2R	12905187	12905387
chr2R	12915786	12915986
chr2R	12936448	12936648
chr2R	12946253	12946453
chr2R	12947787	12947987
chr2R	12955958	12956158
chr2R	12957851	12958051
chr2R	12958654	12958854
chr2R	12979527	12979727
chr2R	12980736	12980936
chr2R	12984612	12984812
chr2R	12984976	12985176
chr2R	12985742	12985942
chr2R	12991874	12992074
chr2R	12996311	12996511
chr2R	12997040	12997240
chr2R	13005022	13005222
chr2R	13015644	13015844
chr2R	13035330	13035530
chr2R	13038807	13039007
chr2R	13041602	13041802
chr2R	13042088	13042288
chr2R	13158179	13158379
chr2R	13167885	13168085
chr2R	13187978	13188178
chr2R	13189303	13189503
chr2R	13190051	13190251
chr2R	13191503	13191703
chr2R	13192885	13193085
chr2R	13194981	13195181
chr2R	13219208	13219408
chr2R	13222280	13222480
chr2R	13223688	13223888
chr2R	13337333	13337533
chr2R	13365531	13365731
chr2R	13424968	13425168
chr2R	13449341	13449541
chr2R	13449890	13450090
chr2R	13450405	13450605
chr2R	13481996	13482196
chr2R	13482690	13482890
chr2R	13483106	13483306
chr2R	13494811	13495011
chr2R	13502173	13502373
chr2R	13502664	13502864
chr2R	13539744	13539944
chr2R	13555929	13556129
chr2R	13557983	13558183
chr2R	13561653	13561853
chr2R	13563197	13563397
chr2R	13563847	13564047
chr2R	13564177	13564377
chr2R	13564637	13564837
chr2R	13565893	13566093
chr2R	13566499	13566699
chr2R	13579729	13579929
chr2R	13584026	13584226
chr2R	13592996	13593196
chr2R	13620301	13620501
chr2R	13621321	13621521
chr2R	13622823	13623023
chr2R	13629665	13629865
chr2R	13822777	13822977
chr2R	13824493	13824693
chr2R	13826243	13826443
chr2R	13826553	13826753
chr2R	13829235	13829435
chr2R	13839841	13840041
chr2R	13919546	13919746
chr2R	13924141	13924341
chr2R	13925489	13925689
chr2R	13926057	13926257
chr2R	13934737	13934937
chr2R	13939790	13939990
chr2R	13941150	13941350
chr2R	13942049	13942249
chr2R	13946963	13947163
chr2R	13953992	13954192
chr2R	13957494	13957694
chr2R	13958093	13958293
chr2R	13960528	13960728
chr2R	13964486	13964686
chr2R	13991112	13991312
chr2R	13991761	13991961
chr2R	13992427	13992627
chr2R	13995847	13996047
chr2R	14000904	14001104
chr2R	14001758	14001958
chr2R	14006780	14006980
chr2R	14008343	14008543
chr2R	14026932	14027132
chr2R	14031356	14031556
chr2R	14041139	14041339
chr2R	14044274	14044474
chr2R	14069319	14069519
chr2R	14139909	14140109
chr2R	14140898	14141098
chr2R	14164570	14164770
chr2R	14173560	14173760
chr2R	14208109	14208309
chr2R	14216517	14216717
chr2R	14219744	14219944
chr2R	14255966	14256166
chr2R	14270560	14270760
chr2R	14275345	14275545
chr2R	14307420	14307620
chr2R	14307998	14308198
chr2R	14311610	14311810
chr2R	14312587	14312787
chr2R	14332225	14332425
chr2R	14411668	14411868
chr2R	14432193	14432393
chr2R	14448977	14449177
chr2R	14458324	14458524
chr2R	14481440	14481640
chr2R	14481826	14482026
chr2R	14503832	14504032
chr2R	14526454	14526654
chr2R	14526938	14527138
chr2R	14618066	14618266
chr2R	14618613	14618813
chr2R	14621549	14621749
chr2R	14649557	14649757
chr2R	14713565	14713765
chr2R	14715851	14716051
chr2R	14752244	14752444
chr2R	14755809	14756009
chr2R	14765568	14765768
chr2R	14768697	14768897
chr2R	14799092	14799292
chr2R	14799568	14799768
chr2R	14800135	14800335
chr2R	14804514	14804714
chr2R	14814346	14814546
chr2R	14908230	14908430
chr2R	14928152	14928352
chr2R	14929090	14929290
chr2R	14933270	14933470
chr2R	14933836	14934036
chr2R	14954524	14954724
chr2R	14958378	14958578
chr2R	14958995	14959195
chr2R	14959566	14959766
chr2R	14962466	14962666
chr2R	14962891	14963091
chr2R	14964493	14964693
chr2R	14965508	14965708
chr2R	14970169	14970369
chr2R	14981185	14981385
chr2R	14981820	14982020
chr2R	14982418	14982618
chr2R	14995411	14995611
chr2R	15010803	15011003
chr2R	15032885	15033085
chr2R	15034097	15034297
chr2R	15116326	15116526
chr2R	15128315	15128515
chr2R	15128654	15128854
chr2R	15130869	15131069
chr2R	15135242	15135442
chr2R	15155219	15155419
chr2R	15213561	15213761
chr2R	15248284	15248484
chr2R	15252472	15252672
chr2R	15308395	15308595
chr2R	15309231	15309431
chr2R	15329285	15329485
chr2R	15349596	15349796
chr2R	15350018	15350218
chr2R	15373185	15373385
chr2R	15374472	15374672
chr2R	15380958	15381158
chr2R	15424989	15425189
chr2R	15497181	15497381
chr2R	15532205	15532405
chr2R	15600418	15600618
chr2R	15610035	15610235
chr2R	15610893	15611093
chr2R	15613689	15613889
chr2R	15648836	15649036
chr2R	15667351	15667551
chr2R	15675361	15675561
chr2R	15675992	15676192
chr2R	15699824	15700024
chr2R	15735248	15735448
chr2R	15736123	15736323
chr2R	15739386	15739586
chr2R	15740090	15740290
chr2R	15809037	15809237
chr2R	15813761	15813961
chr2R	15817001	15817201
chr2R	15848025	15848225
chr2R	15861297	15861497
chr2R	15886619	15886819
chr2R	15890870	15891070
chr2R	15895842	15896042
chr2R	15897994	15898194
chr2R	15922029	15922229
chr2R	15930186	15930386
chr2R	15931345	15931545
chr2R	15931887	15932087
chr2R	15934678	15934878
chr2R	16014761	16014961
chr2R	16031230	16031430
chr2R	16031743	16031943
chr2R	16047496	16047696
chr2R	16086733	16086933
chr2R	16097253	16097453
chr2R	16098426	16098626
chr2R	16102616	16102816
chr2R	16103195	16103395
chr2R	16104393	16104593
chr2R	16110476	16110676
chr2R	16111026	16111226
chr2R	16125165	16125365
chr2R	16129069	16129269
chr2R	16129503	16129703
chr2R	16130235	16130435
chr2R	16155462	16155662
chr2R	16178677	16178877
chr2R	16179176	16179376
chr2R	16180074	16180274
chr2R	16187693	16187893
chr2R	16206512	16206712
chr2R	16210397	16210597
chr2R	16221208	16221408
chr2R	16221731	16221931
chr2R	16270512	16270712
chr2R	16335883	16336083
chr2R	16336582	16336782
chr2R	16338929	16339129
chr2R	16347413	16347613
chr2R	16366545	16366745
chr2R	16377016	16377216
chr2R	16386352	16386552
chr2R	16386770	16386970
chr2R	16499938	16500138
chr2R	16514940	16515140
chr2R	16516033	16516233
chr2R	16517150	16517350
chr2R	16519045	16519245
chr2R	16520695	16520895
chr2R	16571682	16571882
chr2R	16579855	16580055
chr2R	16580634	16580834
chr2R	16583432	16583632
chr2R	16583851	16584051
chr2R	16585659	16585859
chr2R	16594269	16594469
chr2R	16594716	16594916
chr2R	16607879	16608079
chr2R	16611607	16611807
chr2R	16611982	16612182
chr2R	16667913	16668113
chr2R	16731176	16731376
chr2R	16764380	16764580
chr2R	16828849	16829049
chr2R	16830604	16830804
chr2R	16856435	16856635
chr2R	16857109	16857309
chr2R	16867612	16867812
chr2R	16924713	16924913
chr2R	17015889	17016089
chr2R	17019379	17019579
chr2R	17026633	17026833
chr2R	17027124	17027324
chr2R	17027603	17027803
chr2R	17028291	17028491
chr2R	17097323	17097523
chr2R	17100088	17100288
chr2R	17145898	17146098
chr2R	17265296	17265496
chr2R	17302638	17302838
chr2R	17335774	17335974
chr2R	17345136	17345336
chr2R	17345827	17346027
chr2R	17348445	17348645
chr2R	17394528	17394728
chr2R	17419523	17419723
chr2R	17420377	17420577
chr2R	17420789	17420989
chr2R	17457537	17457737
chr2R	17458588	17458788
chr2R	17461408	17461608
chr2R	17462271	17462471
chr2R	17476261	17476461
chr2R	17479038	17479238
chr2R	17535751	17535951
chr2R	17547641	17547841
chr2R	17548301	17548501
chr2R	17590753	17590953
chr2R	17593123	17593323
chr2R	17639078	17639278
chr2R	17665495	17665695
chr2R	17679223	17679423
chr2R	17683124	17683324
chr2R	17686841	17687041
chr2R	17691611	17691811
chr2R	17698333	17698533
chr2R	17716486	17716686
chr2R	17717405	17717605
chr2R	17719117	17719317
chr2R	17734581	17734781
chr2R	17766900	17767100
chr2R	17794140	17794340
chr2R	17796073	17796273
chr2R	17801055	17801255
chr2R	17801695	17801895
chr2R	17802461	17802661
chr2R	17804176	17804376
chr2R	17809230	17809430
chr2R	17813957	17814157
chr2R	17820877	17821077
chr2R	17823406	17823606
chr2R	17850732	17850932
chr2R	17851515	17851715
chr2R	17855674	17855874
chr2R	17871999	17872199
chr2R	17892325	17892525
chr2R	18008581	18008781
chr2R	18062030	18062230
chr2R	18125740	18125940
chr2R	18128384	18128584
chr2R	18133643	18133843
chr2R	18140671	18140871
chr2R	18141157	18141357
chr2R	18156303	18156503
chr2R	18156861	18157061
chr2R	18157833	18158033
chr2R	18160356	18160556
chr2R	18171463	18171663
chr2R	18184030	18184230
chr2R	18194603	18194803
chr2R	18229781	18229981
chr2R	18230477	18230677
chr2R	18231177	18231377
chr2R	18231682	18231882
chr2R	18232597	18232797
chr2R	18255070	18255270
chr2R	18288713	18288913
chr2R	18309702	18309902
chr2R	18355217	18355417
chr2R	18355787	18355987
chr2R	18357546	18357746
chr2R	18377489	18377689
chr2R	18404508	18404708
chr2R	18406800	18407000
chr2R	18407378	18407578
chr2R	18407734	18407934
chr2R	18411894	18412094
chr2R	18412307	18412507
chr2R	18413498	18413698
chr2R	18440809	18441009
chr2R	18442608	18442808
chr2R	18445803	18446003
chr2R	18514871	18515071
chr2R	18515733	18515933
chr2R	18536729	18536929
chr2R	18583284	18583484
chr2R	18611763	18611963
chr2R	18639175	18639375
chr2R	18660539	18660739
chr2R	18673447	18673647
chr2R	18677618	18677818
chr2R	18677990	18678190
chr2R	18687997	18688197
chr2R	18688648	18688848
chr2R	18717385	18717585
chr2R	18717954	18718154
chr2R	18796650	18796850
chr2R	18799795	18799995
chr2R	18800437	18800637
chr2R	18806084	18806284
chr2R	18846231	18846431
chr2R	18877950	18878150
chr2R	18957143	18957343
chr2R	18971076	18971276
chr2R	18973080	18973280
chr2R	19066920	19067120
chr2R	19142036	19142236
chr2R	19143022	19143222
chr2R	19143985	19144185
chr2R	19155048	19155248
chr2R	19164093	19164293
chr2R	19164460	19164660
chr2R	19178589	19178789
chr2R	19179081	19179281
chr2R	19228946	19229146
chr2R	19229783	19229983
chr2R	19275503	19275703
chr2R	19293122	19293322
chr2R	19325442	19325642
chr2R	19356537	19356737
chr2R	19357189	19357389
chr2R	19395070	19395270
chr2R	19411344	19411544
chr2R	19424120	19424320
chr2R	19442185	19442385
chr2R	19450100	19450300
chr2R	19451465	19451665
chr2R	19452420	19452620
chr2R	19455745	19455945
chr2R	19456609	19456809
chr2R	19456958	19457158
chr2R	19467277	19467477
chr2R	19468192	19468392
chr2R	19531928	19532128
chr2R	19617693	19617893
chr2R	19619771	19619971
chr2R	19626676	19626876
chr2R	19630657	19630857
chr2R	19631454	19631654
chr2R	19631897	19632097
chr2R	19658534	19658734
chr2R	19659342	19659542
chr2R	19659972	19660172
chr2R	19660538	19660738
chr2R	19661216	19661416
chr2R	19661633	19661833
chr2R	19668071	19668271
chr2R	19669056	19669256
chr2R	19691955	19692155
chr2R	19726821	19727021
chr2R	19825660	19825860
chr2R	19826352	19826552
chr2R	19997543	19997743
chr2R	20106488	20106688
chr2R	20111175	20111375
chr2R	20245315	20245515
chr2R	20262809	20263009
chr2R	20263834	20264034
chr2R	20274425	20274625
chr2R	20313485	20313685
chr2R	20319683	20319883
chr2R	20320071	20320271
chr2R	20326750	20326950
chr2R	20327601	20327801
chr2R	20336814	20337014
chr2R	20423758	20423958
chr2R	20439225	20439425
chr2R	20511156	20511356
chr2R	20531532	20531732
chr2R	20541633	20541833
chr2R	20582060	20582260
chr2R	20582604	20582804
chr2R	20583559	20583759
chr2R	20584365	20584565
chr2R	20587973	20588173
chr2R	20588347	20588547
chr2R	20596182	20596382
chr2R	20598130	20598330
chr2R	20602835	20603035
chr2R	20607413	20607613
chr2R	20646246	20646446
chr2R	20665686	20665886
chr2R	20667152	20667352
chr2R	20667972	20668172
chr2R	20671032	20671232
chr2R	20673616	20673816
chr2R	20697851	20698051
chr2R	20698308	20698508
chr2R	20770977	20771177
chr2R	20771205	20771405
chr2R	20831829	20832029
chr2R	20832357	20832557
chr2R	20836263	20836463
chr2R	20842069	20842269
chr2R	20884452	20884652
chr2R	20888803	20889003
chr2R	20896329	20896529
chr2R	20897650	20897850
chr2R	20903550	20903750
chr2R	20907345	20907545
chr2R	20916206	20916406
chr2R	20916579	20916779
chr2R	20919801	20920001
chr2R	20933058	20933258
chr2R	20943482	20943682
chr2R	20961021	20961221
chr2R	20970252	20970452
chr2R	20976891	20977091
chr2R	20994776	20994976
chr2R	20996982	20997182
chr2R	20998139	20998339
chr2R	21000367	21000567
chr2R	21047817	21048017
chr2R	21048052	21048252
chr2R	21056808	21057008
chr2R	21075920	21076120
chr2R	21101674	21101874
chr2R	21128004	21128204
[truncated: 4,374 more rows]
